# Supplementary material for: Altered Blood and Brain Expression of Inflammation and Redox Genes in Alzheimer’s Disease, Common to APPV717I × TAUP301L Mice and Patients
Source: MDPI journal article supplement (doi:10.3390/ijms23105799), 2022-05-21
Supplement: s1 [file s1]

**Supplementary Table 4.** Comparison of genes dysregulated in the hippocampus of AT mice (FC>|2|, p<0.05) and in post-mortem samples of AD brain from different microarray data sets considering a FR>|1.3| and nominal p-value < 0.05.

|                    | Gene  | AT vs WT (FC> 2 , HP) | GEODATASET Human Brain          | Significance            | Ref         |
|--------------------|-------|-----------------------|---------------------------------|-------------------------|-------------|
| Inflammatory genes | IL-19 | ↑ FR=3.66; p=0.034    | ↑ 17 AD vs 19 CTRL (TB)         | FR=1.40; p=0.0004*      | [GSE138260] |
|                    |       |                       | ↑ 7 AD vs 4 CTRL (FC)           | <b>FR=1.80; p=0.03</b>  | [GSE185909] |
|                    | F2R   | ↑ FR=2.84; p=0.004    | ↑ 7 incipient AD vs 9 CTRL (HP) | <b>FR=2; p=0.004</b>    | [GSE1297]   |
|                    |       |                       | ↑ 7 severe AD vs 9 CTRL (HP)    | <b>FR=2.03; p=0.002</b> | [GSE1297]   |
|                    |       |                       | ↑ 36 AD vs 16 CTRL (EC)         | FR=1.38; p=0.0012*      | [GSE118553] |
|                    | TLR6  | ↑ FR=2.75; p=0.001    | ↑ 7 AD vs 4 CTRL (FC)           | <b>FR=1.62; p=0.024</b> | [GSE185909] |
|                    | IL-1B | ↑ FR=2.90; p=0.006    | ↓ 7 severe AD vs 8 CTRL (GM)    | FR=-10.86; p=0.00000698 | [GSE28146]  |
|                    | LTA   | ↑ FR=2.17; p=0.034    | ↑ 17 AD vs 19 CTRL (TB)         | FR=1.49; p=0.001*       | [GSE138260] |
|                    |       |                       | ↑ 7 AD vs 4 CTRL (FC)           | <b>FR=1.61; p=0.024</b> | [GSE185909] |
|                    |       |                       | ↑ 7 incipient AD vs 8 CTRL (GM) | <b>FR=3.51; p=0.002</b> | [GSE28146]  |
|                    |       |                       | ↑ 8 AD vs 8 CTRL (NCX)          | <b>FR=1.57; p=0.05</b>  | [GSE37264]  |
| Redox genes        | CSF2  | ↓ FR=-2.20; p=0.021   | ↑ 7 incipient AD vs 9 CTRL (HP) | FR=1.98; p=0.02         | [GSE1297]   |
|                    |       |                       | ↑ 7 severe AD vs 9 CTRL (HP)    | FR=2.41; p=0.00009546   | [GSE1297]   |
|                    | RAG2  | ↑ FR=3.80; p=0.034    | ↑ 19 AD vs 26 CTRL (HP)         | FR=1.33; p=0.00453      | [GSE48350]  |
|                    | NOXA1 | ↑ FR=3.39; p=0.009    | ↓ 17 AD vs 19 CTRL (TB)         | FR=-1.34; p=0.001*      | [GSE138260] |
|                    | MPO   | ↑ FR=2.64; p=0.034    | ↑ 7 AD vs 4 CTRL (FC)           | FR=1.336; p=0.029       | [GSE185909] |

|  |             |                    |                                 |                             |             |
|--|-------------|--------------------|---------------------------------|-----------------------------|-------------|
|  | <b>GPX3</b> | ↑ FR=2.36; p=0.016 | ↑ 36 AD vs 16 CTRL (EC)         | <b>FR=1.66; p=0.000025*</b> | [GSE118553] |
|  | <b>CYBA</b> | ↑ FR=2.21; p=0.012 | ↑ 36 AD vs 18 CTRL (CRB)        | FR=1.41; p=0.0175*          | [GSE118553] |
|  |             |                    | ↑ 36 AD vs 16 CTRL (EC)         | FR=1.31; p=0.018*           | [GSE118553] |
|  | <b>EPX</b>  | ↑ FR=2.15; p=0.009 | ↑ 7 AD vs 4 CTRL (FC)           | FR=1.42; p=0.022            | [GSE185909] |
|  |             |                    | ↓ 36 AD vs 16 CTRL (EC)         | FR=-1.37; p=0.01*           | [GSE118553] |
|  | <b>NOX1</b> | ↑ FR=2.14; p=0.004 | ↑ 7 incipient AD vs 9 CTRL (HP) | <b>FR=1.66; p=0.04</b>      | [GSE1297]   |

**Legend:** HP= hippocampus; FCX= frontal cortex; GM= grey matter; NCX=neocortex; EC= entorhinal cortex; CRB=cerebellum; TB=total brain; \* adjusted p-value<0.05
