# Supplementary material for: Altered Blood and Brain Expression of Inflammation and Redox Genes in Alzheimer’s Disease, Common to APPV717I × TAUP301L Mice and Patients
Source: MDPI journal article supplement (doi:10.3390/ijms23105799), 2022-05-21
Supplement: s1 [file s1]

**Supplementary Table 2.** Gene expression levels of investigated transcripts. Data is presented

|        |                   |              |        |          | 2 <sup>-</sup> ΔCT | 2 <sup>-</sup> ΔCT | 2 <sup>-</sup> ΔCT |
|--------|-------------------|--------------|--------|----------|--------------------|--------------------|--------------------|
| CODE   | Hippocampus/Blood | Genotype     | Sex    | AGE_week | Gsr                | Osgin1             | Agt                |
| AT_452 | Hippocampus       | AT_transgene | Male   | 54.00    |                    |                    | 0.057239           |
| AT_458 | Hippocampus       | AT_transgene | Male   | 51.00    |                    |                    | 0.228420           |
| AT_459 | Hippocampus       | AT_transgene | Male   | 51.00    |                    |                    | 0.132632           |
| AT_462 | Hippocampus       | AT_transgene | Male   | 53.00    |                    |                    | 0.025606           |
| AT_471 | Hippocampus       | AT_transgene | Male   | 51.00    |                    |                    | 0.114265           |
| AT_563 | Hippocampus       | AT_transgene | Male   | 60.00    |                    |                    | 0.072441           |
| AT_574 | Hippocampus       | AT_transgene | Female | 58.00    |                    |                    | 0.118317           |
| AT_576 | Hippocampus       | AT_transgene | Male   | 58.00    |                    |                    | 0.087665           |
| AT_579 | Hippocampus       | AT_transgene | Male   | 57.00    |                    |                    | 0.037482           |
| AT_580 | Hippocampus       | AT_transgene | Male   | 57.00    |                    |                    | 0.146782           |
| WT_146 | Hippocampus       | Wild type    | Male   | 54.00    |                    |                    | 0.111290           |
| WT_154 | Hippocampus       | Wild type    | Male   | 51.00    |                    |                    | 0.028307           |
| WT_155 | Hippocampus       | Wild type    | Male   | 51.00    |                    |                    | 0.072076           |
| WT_156 | Hippocampus       | Wild type    | Male   | 51.00    |                    |                    | 0.090257           |
| WT_157 | Hippocampus       | Wild type    | Female | 52.00    |                    |                    | 0.179284           |
| WT_160 | Hippocampus       | Wild type    | Male   | 52.00    |                    |                    | 0.025007           |
| WT_206 | Hippocampus       | Wild type    | Female | 59.00    |                    |                    | 0.011143           |
| WT_207 | Hippocampus       | Wild type    | Female | 59.00    |                    |                    | 0.020458           |
| AT_452 | Blood             | AT_transgene | Male   | 54.00    |                    |                    | 0.001010           |
| AT_458 | Blood             | AT_transgene | Male   | 51.00    |                    |                    | 0.000299           |
| AT_462 | Blood             | AT_transgene | Male   | 53.00    |                    |                    | 0.000021           |
| AT_471 | Blood             | AT_transgene | Male   | 51.00    |                    |                    | 0.000214           |
| AT_563 | Blood             | AT_transgene | Male   | 60.00    |                    |                    | 0.000230           |
| AT_574 | Blood             | AT_transgene | Female | 58.00    |                    |                    | 0.000019           |
| AT_576 | Blood             | AT_transgene | Male   | 58.00    |                    |                    | 0.000180           |
| AT_579 | Blood             | AT_transgene | Male   | 57.00    |                    |                    | 0.000000           |
| AT_580 | Blood             | AT_transgene | Male   | 57.00    |                    |                    | 0.000013           |
| WT_154 | Blood             | Wild type    | Male   | 51.00    |                    |                    | 0.000100           |
| WT_155 | Blood             | Wild type    | Male   | 51.00    |                    |                    | 0.000800           |
| WT_156 | Blood             | Wild type    | Male   | 51.00    |                    |                    | 0.005100           |
| WT_158 | Blood             | Wild type    | Female | 52.00    |                    |                    | 0.000000           |
| WT_160 | Blood             | Wild type    | Female | 52.00    |                    |                    | 0.000053           |
| WT_206 | Blood             | Wild type    | Female | 59.00    |                    |                    | 0.000202           |
| WT_207 | Blood             | Wild type    | Female | 59.00    |                    |                    | 0.000000           |
| AT_537 | Blood             | AT_transgene | Female | 52.00    | 2.99771            | 0.06752            |                    |
| AT_538 | Blood             | AT_transgene | Female | 52.00    | 3.99819            | 0.08340            |                    |
| AT_540 | Blood             | AT_transgene | Male   | 52.00    | 4.46170            | 0.18295            |                    |
| AT_544 | Blood             | AT_transgene | Male   | 51.00    | 3.26477            | 0.09451            |                    |
| AT_547 | Blood             | AT_transgene | Male   | 48.00    | 2.98707            | 0.10393            |                    |
| AT_548 | Blood             | AT_transgene | Male   | 48.00    | 3.41919            | 0.07760            |                    |

|        |       |            |        |       |         |         |
|--------|-------|------------|--------|-------|---------|---------|
| AT 549 | Blood | AT_transge | Male   | 48.00 | 2.31873 | 0.07424 |
| AT 552 | Blood | AT_transge | Female | 49.00 | 2.02624 | 0.08724 |
| AT 553 | Blood | AT_transge | Female | 49.00 | 2.03449 | 0.06244 |
| AT 554 | Blood | AT_transge | Female | 49.00 | 2.44676 | 0.08335 |
| AT 590 | Blood | AT_transge | Female | 52.00 | 2.58184 | 0.11756 |
| AT 591 | Blood | AT_transge | Female | 52.00 | 2.61705 | 0.13825 |
| AT 597 | Blood | AT_transge | Male   | 52.00 | 1.78480 | 0.11955 |
| AT 605 | Blood | AT_transge | Female | 51.00 | 2.86297 | 0.14703 |
| AT 607 | Blood | AT_transge | Male   | 50.00 | 2.33519 | 0.13559 |
| AT 624 | Blood | AT_transge | Female | 44.00 | 1.89346 | 0.14537 |
| AT 632 | Blood | AT_transge | Male   | 44.00 | 1.48789 | 0.06742 |
| AT 636 | Blood | AT_transge | Female | 43.00 | 2.17075 | 0.07401 |
| AT 643 | Blood | AT_transge | Male   | 44.00 | 1.78526 | 0.12775 |
| AT 645 | Blood | AT_transge | Female | 39.00 | 2.34430 | 0.16616 |
| AT 646 | Blood | AT_transge | Male   | 39.00 | 2.14577 | 0.12136 |
| WT 197 | Blood | Wild type  | Male   | 57.00 | 1.01563 | 0.02027 |
| WT 198 | Blood | Wild type  | Male   | 57.00 | 1.04598 | 0.02596 |
| WT 199 | Blood | Wild type  | Male   | 57.00 | 1.16306 | 0.02692 |
| WT 203 | Blood | Wild type  | Male   | 49.00 | 1.31182 | 0.03496 |
| WT 204 | Blood | Wild type  | Male   | 49.00 | 0.94014 | 0.03890 |
| WT 208 | Blood | Wild type  | Male   | 41.00 | 1.30158 | 0.03608 |
| WT 210 | Blood | Wild type  | Male   | 54.00 | 1.32751 | 0.03692 |
| WT 211 | Blood | Wild type  | Male   | 54.00 | 0.99250 | 0.01866 |
| WT 215 | Blood | Wild type  | Female | 45.00 | 1.51500 | 0.06505 |
| WT 216 | Blood | Wild type  | Female | 45.00 | 1.92478 | 0.08915 |
| WT 219 | Blood | Wild type  | Male   | 43.00 | 0.73703 | 0.03192 |
| WT 220 | Blood | Wild type  | Female | 43.00 | 1.58190 | 0.05385 |
| AT 716 | Blood | AT_transge | Female | 38.00 | 1.48716 | 0.11127 |
| AT 718 | Blood | AT_transge | Female | 38.00 | 1.42125 | 0.10827 |
| AT 720 | Blood | AT_transge | Female | 38.00 | 1.34626 | 0.07365 |
| AT 724 | Blood | AT_transge | Male   | 38.00 | 2.82202 | 0.09250 |
| AT 725 | Blood | AT_transge | Male   | 38.00 | 1.64831 | 0.06373 |
| AT 733 | Blood | AT_transge | Female | 36.00 | 1.26580 | 0.08279 |
| AT 735 | Blood | AT_transge | Female | 36.00 | 1.41470 | 0.06083 |
| WT 283 | Blood | Wild type  | Female | 37.00 | 1.03376 | 0.05300 |
| WT 284 | Blood | Wild type  | Female | 37.00 | 1.32198 | 0.04993 |
| WT 287 | Blood | Wild type  | Female | 37.00 | 1.14291 | 0.04763 |
| WT 288 | Blood | Wild type  | Female | 36.00 | 0.52029 | 0.02530 |
| WT 289 | Blood | Wild type  | Female | 36.00 | 1.27542 | 0.04541 |
| WT 292 | Blood | Wild type  | Male   | 37.00 | 0.42435 | 0.04927 |
| WT 293 | Blood | Wild type  | Male   | 37.00 | 0.91196 | 0.07313 |
| WT 294 | Blood | Wild type  | Male   | 37.00 | 1.04303 | 0.05837 |

ited as 2<sup>-ΔCT</sup> values.

| 2 <sup>-ΔCT</sup> |
|-------------------|-------------------|-------------------|-------------------|-------------------|-------------------|-------------------|-------------------|-------------------|
| <b>Akt1</b>       | <b>Atf1</b>       | <b>Atf2</b>       | <b>Bcl10</b>      | <b>Bcl2a1a</b>    | <b>Bcl2l1</b>     | <b>Bcl3</b>       | <b>Birc3</b>      | <b>Card10</b>     |
| 0.195216          | 0.069019          | 0.175938          | 0.044599          | 0.001681          | 0.153163          | 0.000141          | 0.003408          | 0.002987          |
| 0.226842          | 0.076402          | 0.219115          | 4.227371          | 0.002524          | 0.230009          | 0.000459          | 0.003194          | 0.005718          |
| 0.254458          | 0.078319          | 0.187570          | 0.054617          | 0.001961          | 0.216960          | 0.000266          | 0.003185          | 0.002735          |
| 0.183344          | 0.064822          | 0.184619          | 0.045205          | 0.001877          | 0.155246          | 0.000187          | 0.002426          | 0.002986          |
| 0.230119          | 0.082495          | 0.250079          | 0.054805          | 0.002542          | 0.184342          | 0.000305          | 0.002422          | 0.003425          |
| 0.100339          | 0.070460          | 0.219601          | 0.029217          | 0.004591          | 0.163001          | 0.000183          | 0.003201          | 0.003807          |
| 0.106633          | 0.100184          | 0.236633          | 0.034933          | 0.003379          | 0.180582          | 0.000109          | 0.003498          | 0.003379          |
| 0.121426          | 0.129242          | 0.236211          | 0.035113          | 0.004904          | 0.179014          | 0.000187          | 0.002628          | 0.003956          |
| 0.093581          | 0.062602          | 0.175843          | 0.028803          | 0.004589          | 0.138923          | 0.000203          | 0.002082          | 0.003359          |
| 0.109709          | 0.092254          | 0.250303          | 0.033072          | 0.005343          | 0.161740          | 0.000210          | 0.003674          | 0.003726          |
| 0.183315          | 0.060892          | 0.188469          | 0.040174          | 0.003049          | 0.162939          | 0.000241          | 0.002494          | 0.002767          |
| 0.190429          | 0.064584          | 0.215733          | 0.048272          | 0.001936          | 0.177676          | 0.000108          | 0.003080          | 0.002351          |
| 0.212517          | 0.088122          | 0.268995          | 0.055386          | 0.001792          | 0.194205          | 0.000312          | 0.001881          | 0.004203          |
| 0.190807          | 0.074335          | 0.196172          | 0.053667          | 0.001228          | 0.188180          | 0.000129          | 0.001018          | 0.004045          |
| 0.243218          | 0.065169          | 0.193488          | 0.051130          | 0.002525          | 0.211733          | 0.000148          | 0.002065          | 0.003285          |
| 0.123150          | 0.057451          | 0.186660          | 0.034879          | 0.011747          | 0.151615          | 0.000140          | 0.002470          | 0.003236          |
| 0.034489          | 0.012712          | 0.037222          | 0.006356          | 0.011066          | 0.037481          | 0.000069          | 0.000262          | 0.002025          |
| 0.145470          | 0.058266          | 0.148527          | 0.025538          | 0.009544          | 0.153765          | 0.000078          | 0.001479          | 0.003041          |
| 0.070260          | 0.107980          | 0.069774          | 0.168269          | 0.021180          | 0.663809          | 0.002818          | 0.029336          | 0.004271          |
| 0.109653          | 0.096122          | 0.058355          | 0.201802          | 0.016076          | 1.165550          | 0.005843          | 0.056760          | 0.005230          |
| 0.048490          | 0.072485          | 0.044312          | 0.122753          | 0.013451          | 0.511863          | 0.001444          | 0.026166          | 0.002808          |
| 0.095493          | 0.061279          | 0.036945          | 0.188357          | 0.012617          | 1.730924          | 0.004523          | 0.027423          | 0.006715          |
| 0.071606          | 0.065435          | 0.041701          | 0.141240          | 0.015476          | 0.798972          | 0.005285          | 0.024117          | 0.001518          |
| 0.118838          | 0.085797          | 0.044720          | 0.156807          | 0.029300          | 0.542264          | 0.011655          | 0.038395          | 0.007583          |
| 0.090501          | 0.051620          | 0.037268          | 0.186091          | 0.020250          | 0.765291          | 0.006147          | 0.024931          | 0.008573          |
| 0.092727          | 0.093372          | 0.048669          | 0.162571          | 0.015401          | 1.013353          | 0.005187          | 0.029547          | 0.005716          |
| 0.062855          | 0.065980          | 0.043833          | 0.114878          | 0.011583          | 0.822550          | 0.004359          | 0.031866          | 0.006887          |
| 0.059210          | 0.041580          | 0.028010          | 0.118410          | 0.043950          | 0.532890          | 0.004990          | 0.048760          | 0.002100          |
| 0.055630          | 0.036450          | 0.028600          | 0.171000          | 0.007150          | 1.103510          | 0.002640          | 0.028600          | 0.001390          |
| 0.045200          | 0.051560          | 0.056430          | 0.123490          | 0.017490          | 0.718210          | 0.005500          | 0.025080          | 0.003650          |
| 0.055460          | 0.044737          | 0.036337          | 0.164665          | 0.009736          | 1.655884          | 0.004297          | 0.024478          | 0.003466          |
| 0.072631          | 0.060235          | 0.056985          | 0.129116          | 0.015375          | 0.597387          | 0.011100          | 0.053169          | 0.000151          |
| 0.043489          | 0.062362          | 0.037338          | 0.085188          | 0.026402          | 0.640292          | 0.002834          | 0.021445          | 0.005990          |
| 0.040340          | 0.041763          | 0.027553          | 0.073729          | 0.061145          | 0.341125          | 0.003492          | 0.021920          | 0.001871          |



| 2 <sup>Δ</sup> -ΔCT |
|---------------------|---------------------|---------------------|---------------------|---------------------|---------------------|---------------------|---------------------|---------------------|
| Card11              | Casp1               | Casp8               | Ccl2                | CCL5                | Cd27                | Cd40                | Cflar               | Chuk                |
| 0.000318            | 0.004853            | 0.008276            | 0.000463            | 0.0055960           | 0.004528            | 0.001443            | 0.057637            | 0.121005            |
| 0.000549            | 0.005798            | 0.007704            | 0.000538            | 0.0040510           | 0.004455            | 0.001564            | 0.055160            | 0.154938            |
| 0.000467            | 0.004861            | 0.008464            | 0.000385            | 0.0039400           | 0.004059            | 0.001008            | 0.061448            | 0.159929            |
| 0.000327            | 0.006581            | 0.006957            | 0.000992            | 0.0048460           | 0.003833            | 0.001504            | 0.063049            | 0.144849            |
| 0.000378            | 0.004679            | 0.008792            | 0.000389            | 0.0034755           | 0.004844            | 0.001307            | 0.067473            | 0.149732            |
| 0.001109            | 0.003834            | 0.008390            | 0.001213            | 0.0081305           | 0.001634            | 0.002083            | 0.042187            | 0.252255            |
| 0.001512            | 0.004306            | 0.009231            | 0.000672            | 0.0079495           | 0.001391            | 0.000998            | 0.050791            | 0.269943            |
| 0.001351            | 0.005404            | 0.010295            | 0.000690            | 0.0092850           | 0.002062            | 0.001252            | 0.070226            | 0.280903            |
| 0.001020            | 0.003267            | 0.007053            | 0.000687            | 0.0084440           | 0.001890            | 0.000721            | 0.046467            | 0.180786            |
| 0.001264            | 0.002804            | 0.010910            | 0.001799            | 0.0097025           | 0.002170            | 0.001392            | 0.052620            | 0.246857            |
| 0.000305            | 0.003134            | 0.004918            | 0.000752            | 0.0042035           | 0.002691            | 0.000857            | 0.060054            | 0.150977            |
| 0.000093            | 0.005591            | 0.005514            | 0.000112            | 0.0024460           | 0.003348            | 0.001052            | 0.042315            | 0.175230            |
| 0.000328            | 0.015257            | 0.007576            | 0.000780            | 0.0032530           | 0.003390            | 0.000836            | 0.062312            | 0.187590            |
| 0.000338            | 0.005374            | 0.007978            | 0.000585            | 0.0027770           | 0.003002            | 0.000821            | 0.048704            | 0.163821            |
| 0.000610            | 0.004276            | 0.005720            | 0.000482            | 0.0042945           | 0.003378            | 0.000931            | 0.048709            | 0.162704            |
| 0.000838            | 0.004040            | 0.006563            | 0.000832            | 0.0052700           | 0.002077            | 0.000724            | 0.042349            | 0.174160            |
| 0.000543            | 0.000778            | 0.001403            | 0.000201            | 0.0027555           | 0.000574            | 0.000299            | 0.008926            | 0.041015            |
| 0.000509            | 0.005332            | 0.004706            | 0.000782            | 0.0041180           | 0.001872            | 0.000671            | 0.038978            | 0.180341            |
| 0.012420            | 0.090800            | 0.054744            | 0.001834            | 0.1790670           | 0.068814            | 0.009813            | 0.134795            | 0.140519            |
| 0.044533            | 0.110415            | 0.053698            | 0.000593            | 0.1918630           | 0.100204            | 0.021065            | 0.150832            | 0.083101            |
| 0.010775            | 0.056478            | 0.036495            | 0.000000            | 0.1486560           | 0.056088            | 0.014719            | 0.193960            | 0.127082            |
| 0.021665            | 0.082557            | 0.043936            | 0.000023            | 0.1676930           | 0.083132            | 0.009831            | 0.117566            | 0.042439            |
| 0.023135            | 0.059384            | 0.027322            | 0.001088            | 0.1850385           | 0.069648            | 0.017412            | 0.139295            | 0.082825            |
| 0.015593            | 0.054677            | 0.039475            | 0.002484            | 0.2014560           | 0.070173            | 0.007427            | 0.112427            | 0.072648            |
| 0.011631            | 0.061814            | 0.020820            | 0.000420            | 0.2378880           | 0.037268            | 0.002888            | 0.103959            | 0.060963            |
| 0.005716            | 0.052890            | 0.027378            | 0.000705            | 0.1946345           | 0.076369            | 0.011274            | 0.148562            | 0.091451            |
| 0.019616            | 0.054719            | 0.022377            | 0.001305            | 0.1645955           | 0.068782            | 0.020449            | 0.114878            | 0.073210            |
| 0.029810            | 0.093551            | 0.057587            | 0.001281            | 0.2018340           | 0.033537            | 0.031291            | 0.078667            | 0.072892            |
| 0.041290            | 0.066620            | 0.043649            | #NULL!              | 0.1278365           | 0.051908            | 0.024216            | 0.131406            | 0.050489            |
| 0.044580            | 0.077615            | 0.021680            | 0.000668            | 0.2388695           | 0.035959            | 0.015981            | 0.109764            | 0.092942            |
| 0.028313            | 0.062396            | 0.025517            | 0.000000            | 0.1433795           | 0.039764            | 0.014255            | 0.149436            | 0.060690            |
| 0.086975            | 0.133669            | 0.058995            | 0.002589            | 0.1774905           | 0.050301            | 0.036065            | 0.130918            | 0.074673            |
| 0.022668            | 0.045651            | 0.028892            | 0.000404            | 0.2636090           | 0.032731            | 0.014546            | 0.113976            | 0.090046            |
| 0.011346            | 0.062864            | 0.030999            | 0.000898            | 0.3168210           | 0.029124            | 0.016270            | 0.106459            | 0.110980            |



| 2 <sup>^-</sup> ΔCT |
|---------------------|---------------------|---------------------|---------------------|---------------------|---------------------|---------------------|---------------------|---------------------|
| Crebbp              | Csf1                | Csf2                | Csf3                | Egfr                | Egr1                | Eif2ak2             | Elk1                | F2r                 |
| 0.147946            | 0.037764            | 0.024233            | 0.000287            | 0.014610            | 0.192528            | 0.010260            | 0.154229            | 0.015768            |
| 0.135819            | 0.038734            | 0.050059            | 0.000425            | 0.017821            | 0.216098            | 0.017214            | 0.104369            | 0.043277            |
| 0.142152            | 0.035538            | 0.024783            | 0.000415            | 0.016579            | 0.240732            | 0.009262            | 0.166720            | 0.015256            |
| 0.185903            | 0.036212            | 0.022602            | 0.000273            | 0.012197            | 0.177099            | 0.010115            | 0.187196            | 0.008388            |
| 0.178062            | 0.028566            | 0.022104            | 0.000294            | 0.014482            | 0.129449            | 0.012608            | 0.167294            | 0.017463            |
| 0.147927            | 0.018363            | 0.078181            | 0.001413            | 0.008049            | 0.139947            | 0.012031            | 0.132398            | 0.033100            |
| 0.176866            | 0.013515            | 0.044834            | 0.001054            | 0.007094            | 0.173226            | 0.011365            | 0.134971            | 0.027984            |
| 0.214366            | 0.018050            | 0.068306            | 0.001351            | 0.010224            | 0.139482            | 0.012852            | 0.169358            | 0.038424            |
| 0.129620            | 0.012537            | 0.070921            | 0.001155            | 0.005495            | 0.123481            | 0.009178            | 0.111287            | 0.014806            |
| 0.163998            | 0.016308            | 0.060027            | 0.001383            | 0.009174            | 0.084304            | 0.012974            | 0.075454            | 0.055236            |
| 0.140866            | 0.030236            | 0.098236            | 0.000397            | 0.014105            | 0.197839            | 0.010764            | 0.124343            | 0.014910            |
| 0.182671            | 0.030339            | 0.053191            | 0.000304            | 0.014961            | 0.443597            | 0.009870            | 0.125636            | 0.008834            |
| 0.198286            | 0.034810            | 0.076185            | 0.000366            | 0.022966            | 0.474886            | 0.017285            | 0.151318            | 0.011806            |
| 0.163821            | 0.040672            | 0.041527            | 0.000228            | 0.015095            | 0.267978            | 0.012176            | 0.152850            | 0.016291            |
| 0.143619            | 0.028170            | 0.062514            | 0.000414            | 0.016180            | 0.216182            | 0.008203            | 0.160464            | 0.011362            |
| 0.134762            | 0.023658            | 0.176592            | 0.000729            | 0.008600            | 0.277102            | 0.009153            | 0.148495            | 0.005674            |
| 0.030869            | 0.006489            | 0.160684            | 0.000586            | 0.002408            | 0.038004            | 0.002171            | 0.039344            | 0.001622            |
| 0.143468            | 0.021624            | 0.151648            | 0.000892            | 0.008782            | 0.210049            | 0.008308            | 0.150600            | 0.005520            |
| 0.020888            | 0.010812            | 0.000129            | 0.000000            | 0.001160            | 0.000000            | 0.015612            | 0.004706            | 0.025895            |
| 0.024878            | 0.016187            | 0.000024            | 0.000475            | 0.000028            | 0.000730            | 0.021212            | 0.010034            | 0.018466            |
| 0.007109            | 0.004958            | 0.000098            | 0.000000            | 0.000536            | 0.001173            | 0.009779            | 0.009124            | 0.012993            |
| 0.045485            | 0.015214            | 0.002198            | 0.000000            | 0.000000            | 0.003243            | 0.019391            | 0.004555            | 0.021665            |
| 0.014340            | 0.011020            | 0.005166            | 0.000000            | 0.000000            | 0.001416            | 0.007846            | 0.003560            | 0.013852            |
| 0.018162            | 0.015486            | 0.000015            | 0.000000            | 0.000000            | 0.001616            | 0.010217            | 0.005787            | 0.024983            |
| 0.022314            | 0.008754            | 0.002732            | 0.000000            | 0.000000            | 0.000660            | 0.010852            | 0.006408            | 0.034294            |
| 0.014570            | 0.010966            | 0.007185            | 0.000000            | 0.000000            | 0.005045            | 0.010302            | 0.006042            | 0.033242            |
| 0.014460            | 0.011266            | 0.005184            | 0.000088            | 0.000000            | 0.000350            | 0.008421            | 0.005148            | 0.019481            |
| 0.025241            | 0.003453            | 0.024129            | 0.000295            | 0.000000            | 0.001212            | 0.030436            | 0.004340            | 0.005161            |
| 0.072398            | 0.012024            | 0.000166            | #NULL!              | 0.000000            | 0.009369            | 0.013908            | 0.005807            | 0.009113            |
| 0.024222            | 0.000834            | 0.010691            | 0.000035            | 0.000283            | 0.000088            | 0.019404            | 0.008564            | 0.006908            |
| 0.065046            | 0.007127            | 0.008714            | 0.000000            | 0.000000            | 0.006604            | 0.025341            | 0.003212            | 0.019608            |
| 0.039466            | 0.008297            | 0.000349            | 0.000000            | 0.000000            | 0.004477            | 0.017908            | 0.002974            | 0.015917            |
| 0.012064            | 0.005143            | 0.044096            | 0.000028            | 0.000000            | 0.002536            | 0.016140            | 0.004865            | 0.017299            |
| 0.011665            | 0.001269            | 0.014066            | 0.000026            | 0.000000            | 0.000102            | 0.017804            | 0.003327            | 0.012503            |



| 2 <sup>^-</sup> ΔCT |
|---------------------|---------------------|---------------------|---------------------|---------------------|---------------------|---------------------|---------------------|---------------------|
| Fadd                | FasI                | Fos                 | Hmox1               | Icam1               | Ifng                | Ikbkb               | Ikbke               | Ikbkg               |
| 0.011150            | 0.000528            | 0.025793            | 0.004655            | 0.006186            | 0.000118            | 0.052307            | 0.001623            | 0.048804            |
| 0.013600            | 0.001490            | 0.030390            | 0.004157            | 0.007493            | 0.000030            | 0.048690            | 0.003129            | 0.043882            |
| 0.012221            | 0.000595            | 0.043752            | 0.004696            | 0.005741            | 0.000032            | 0.049566            | 0.001649            | 0.046893            |
| 0.009838            | 0.000314            | 0.011301            | 0.004080            | 0.004719            | 0.000026            | 0.047125            | 0.001163            | 0.042178            |
| 0.011284            | 0.000553            | 0.006572            | 0.004878            | 0.005156            | 0.000028            | 0.045767            | 0.001689            | 0.046729            |
| 0.014013            | 0.001291            | 0.013630            | 0.006448            | 0.003408            | 0.000055            | 0.023083            | 0.000823            | 0.048461            |
| 0.012523            | 0.001713            | 0.010531            | 0.004879            | 0.002901            | 0.000103            | 0.023047            | 0.001203            | 0.052582            |
| 0.012414            | 0.001332            | 0.016268            | 0.005954            | 0.003983            | 0.000023            | 0.024318            | 0.000885            | 0.045378            |
| 0.010914            | 0.001131            | 0.006860            | 0.006269            | 0.003049            | 0.000025            | 0.018103            | 0.000472            | 0.055259            |
| 0.013246            | 0.001876            | 0.014296            | 0.005343            | 0.003831            | 0.000012            | 0.024891            | 0.000736            | 0.046771            |
| 0.013531            | 0.000632            | 0.018872            | 0.005022            | 0.004311            | 0.000038            | 0.038007            | 0.001452            | 0.042464            |
| 0.010008            | 0.000377            | 0.031409            | 0.004356            | 0.003663            | 0.000000            | 0.044728            | 0.001745            | 0.042023            |
| 0.009009            | 0.001199            | 0.056549            | 0.003710            | 0.005702            | 0.000040            | 0.052036            | 0.001842            | 0.039163            |
| 0.007653            | 0.000833            | 0.047045            | 0.004744            | 0.004979            | 0.000097            | 0.052200            | 0.001620            | 0.037168            |
| 0.009960            | 0.000672            | 0.029367            | 0.004551            | 0.004217            | 0.000054            | 0.040116            | 0.002153            | 0.044204            |
| 0.009027            | 0.000393            | 0.027176            | 0.014973            | 0.002487            | 0.000047            | 0.028726            | 0.001305            | 0.038167            |
| 0.006955            | 0.000210            | 0.005056            | 0.008804            | 0.001171            | 0.000044            | 0.017485            | 0.000566            | 0.009701            |
| 0.007806            | 0.000258            | 0.010018            | 0.012164            | 0.001607            | 0.000228            | 0.031880            | 0.000996            | 0.032102            |
| 0.016733            | 0.008251            | 0.057465            | 0.003445            | 0.010963            | 0.002063            | 0.017934            | 0.022233            | 0.010372            |
| 0.011606            | 0.012967            | 0.102309            | 0.003474            | 0.018854            | 0.001901            | 0.049071            | 0.026296            | 0.010533            |
| 0.011078            | 0.007060            | 0.015996            | 0.002808            | 0.011469            | 0.002847            | 0.012377            | 0.009124            | 0.008395            |
| 0.008210            | 0.003005            | 0.064326            | 0.014901            | 0.021665            | 0.001621            | 0.065677            | 0.017720            | 0.004339            |
| 0.011729            | 0.009931            | 0.013105            | 0.004061            | 0.018026            | 0.002736            | 0.019186            | 0.014241            | 0.004475            |
| 0.013669            | 0.004934            | 0.026043            | 0.006377            | 0.015702            | 0.001650            | 0.031842            | 0.016143            | 0.005747            |
| 0.009253            | 0.010852            | 0.017751            | 0.005735            | 0.013360            | 0.001879            | 0.024418            | 0.010927            | 0.003434            |
| 0.009952            | 0.012167            | 0.018442            | 0.005010            | 0.019629            | #NULL!              | 0.019092            | 0.012337            | 0.007336            |
| 0.011992            | 0.010154            | 0.014866            | 0.002683            | 0.013775            | 0.004836            | 0.018302            | 0.013967            | 0.008191            |
| 0.016423            | 0.006533            | 0.022435            | 0.005532            | 0.033770            | 0.001929            | 0.056013            | 0.015430            | 0.007556            |
| 0.015977            | 0.003701            | 0.024216            | 0.006399            | 0.019806            | 0.000965            | 0.058806            | 0.013250            | 0.003359            |
| 0.009837            | 0.010617            | 0.004282            | 0.005308            | 0.021381            | 0.002904            | 0.031521            | 0.007826            | 0.007004            |
| 0.014554            | 0.004638            | 0.032523            | 0.002955            | 0.014454            | 0.002005            | 0.037359            | 0.014156            | 0.005911            |
| 0.012402            | 0.004385            | 0.032730            | 0.002893            | 0.029909            | 0.001216            | 0.050651            | 0.016139            | 0.008070            |
| 0.010797            | 0.016140            | 0.001744            | 0.006881            | 0.016479            | 0.003817            | 0.025152            | 0.007478            | 0.002589            |
| 0.014263            | 0.013682            | 0.004608            | 0.003666            | 0.013307            | 0.002062            | 0.024491            | 0.008364            | 0.003795            |



| 2 <sup>^-</sup> ΔCT |
|---------------------|---------------------|---------------------|---------------------|---------------------|---------------------|---------------------|---------------------|---------------------|
| Il10                | Il1a                | Il1b                | Il1r1               | Irak1               | Irak2               | Irf1                | Jun                 | Lta                 |
| 0.000027            | 0.002478            | 0.000611            | 0.024402            | 0.053406            | 0.036986            | 0.021540            | 0.197941            | 0.000241            |
| 0.000030            | 0.002649            | 0.001004            | 0.014678            | 0.063362            | 0.056711            | 0.017821            | 0.139638            | 0.000505            |
| 0.000041            | 0.004599            | 0.001330            | 0.039706            | 0.071570            | 0.041392            | 0.020985            | 0.206684            | 0.000118            |
| 0.000036            | 0.003383            | 0.000489            | 0.040741            | 0.065727            | 0.036973            | 0.024057            | 0.262907            | 0.000344            |
| 0.000028            | 0.002614            | 0.001298            | 0.018978            | 0.053306            | 0.029574            | 0.021204            | 0.155012            | 0.000279            |
| 0.000532            | 0.004989            | 0.001494            | 0.016435            | 0.051224            | 0.030458            | 0.009245            | 0.168750            | 0.000846            |
| 0.000307            | 0.004397            | 0.002153            | 0.015100            | 0.055581            | 0.025220            | 0.008794            | 0.144659            | 0.000799            |
| 0.000609            | 0.004870            | 0.001573            | 0.029732            | 0.060713            | 0.031646            | 0.011826            | 0.232959            | 0.000765            |
| 0.000469            | 0.003967            | 0.001970            | 0.020226            | 0.045827            | 0.022598            | 0.009436            | 0.167514            | 0.000945            |
| 0.000531            | 0.006398            | 0.002155            | 0.009563            | 0.044248            | 0.024378            | 0.006137            | 0.119224            | 0.000645            |
| 0.000059            | 0.003178            | 0.000438            | 0.015436            | 0.052644            | 0.043057            | 0.016543            | 0.126079            | 0.000191            |
| 0.000005            | 0.001733            | 0.000512            | 0.013298            | 0.057804            | 0.040874            | 0.018806            | 0.114810            | 0.000093            |
| 0.000037            | 0.002931            | 0.000738            | 0.016929            | 0.062312            | 0.041684            | 0.021280            | 0.126364            | 0.000212            |
| 0.000052            | 0.001953            | 0.000368            | 0.026464            | 0.051126            | 0.039287            | 0.024184            | 0.213187            | 0.000122            |
| 0.000035            | 0.002439            | 0.000358            | 0.016292            | 0.054800            | 0.043294            | 0.018203            | 0.132156            | 0.000145            |
| 0.000247            | 0.003795            | 0.001201            | 0.017806            | 0.048311            | 0.032095            | 0.019894            | 0.144435            | 0.000458            |
| 0.000223            | 0.001656            | 0.000817            | 0.015868            | 0.021378            | 0.014909            | 0.007403            | 0.112057            | 0.000397            |
| 0.000137            | 0.003493            | 0.000719            | 0.020743            | 0.045085            | 0.031660            | 0.020037            | 0.145470            | 0.000407            |
| 0.000000            | 0.007134            | 1.070911            | 0.004097            | 0.030795            | 0.014071            | 0.107980            | 0.010590            | 0.000597            |
| 0.000000            | 0.004103            | 0.973337            | 0.001107            | 0.030628            | 0.025577            | 0.134998            | 0.010460            | 0.002423            |
| 0.000000            | 0.002158            | 0.537311            | 0.001474            | 0.020529            | 0.004406            | 0.045557            | 0.011548            | 0.000829            |
| 0.000000            | 0.001714            | 0.679028            | 0.000863            | 0.035440            | 0.027806            | 0.149845            | 0.012272            | 0.000751            |
| 0.000000            | 0.002132            | 0.437155            | 0.002994            | 0.026391            | 0.012924            | 0.079451            | 0.007023            | 0.002932            |
| 0.000000            | 0.001909            | 1.054871            | 0.002104            | 0.037087            | 0.015379            | 0.131859            | 0.011336            | 0.002590            |
| 0.000000            | 0.002329            | 0.362005            | 0.001102            | 0.024931            | 0.008224            | 0.061387            | 0.004691            | #NULL!              |
| 0.000000            | 0.002007            | 0.945492            | 0.000394            | 0.042663            | 0.010161            | 0.093372            | 0.009679            | 0.001419            |
| 0.000000            | 0.002179            | 0.443860            | 0.001176            | 0.022690            | 0.010084            | 0.058241            | 0.006294            | 0.000605            |
| 0.000701            | 0.002025            | 0.301849            | 0.003525            | 0.025593            | 0.025771            | 0.113589            | 0.003911            | 0.000000            |
| 0.000000            | 0.000894            | 0.264640            | 0.002617            | 0.031296            | 0.023554            | 0.153053            | 0.006811            | 0.001155            |
| 0.000059            | 0.003091            | 0.182059            | 0.003178            | 0.018613            | 0.020796            | 0.078698            | 0.009769            | 0.000664            |
| 0.000000            | 0.001082            | 0.201325            | 0.002351            | 0.045677            | 0.020441            | 0.105667            | 0.008775            | 0.001595            |
| 0.000000            | 0.001436            | 0.357679            | 0.001922            | 0.023630            | 0.037079            | 0.156772            | 0.010722            | 0.001922            |
| 0.000000            | 0.001922            | 0.102721            | 0.003210            | 0.022356            | 0.009142            | 0.051360            | 0.004355            | 0.001708            |
| 0.002556            | 0.000989            | 0.122289            | 0.004576            | 0.024153            | 0.010960            | 0.073220            | 0.007332            | 0.001136            |



| 2 <sup>Δ</sup> -ΔCT |
|---------------------|---------------------|---------------------|---------------------|---------------------|---------------------|---------------------|---------------------|---------------------|
| Ltbr                | Map3k1              | Mapk3               | Myd88               | Nfkb1               | Nfkb2               | Nfkbia              | Nod1                | Raf1                |
| 0.014113            | 0.007994            | 0.374527            | 0.000532            | 0.039095            | 0.002172            | 0.084973            | 0.004623            | 0.172318            |
| 0.015514            | 0.013413            | 0.279275            | 0.000658            | 0.044494            | 0.002506            | 0.122407            | 0.008667            | 0.214606            |
| 0.011403            | 0.012565            | 0.322082            | 0.000967            | 0.034090            | 0.003229            | 0.158824            | 0.008290            | 0.191511            |
| 0.012540            | 0.008159            | 0.319220            | 0.000466            | 0.041310            | 0.002460            | 0.067575            | 0.004919            | 0.196503            |
| 0.013419            | 0.009621            | 0.228530            | 0.000677            | 0.043298            | 0.001981            | 0.080239            | 0.006260            | 0.166138            |
| 0.014915            | 0.011226            | 0.183386            | 0.001291            | 0.029217            | 0.003703            | 0.096921            | 0.013443            | 0.132398            |
| 0.012013            | 0.009690            | 0.190878            | 0.000833            | 0.030411            | 0.003775            | 0.155041            | 0.009825            | 0.125063            |
| 0.013398            | 0.009343            | 0.171722            | 0.001418            | 0.026982            | 0.003019            | 0.133800            | 0.014661            | 0.149493            |
| 0.010616            | 0.006445            | 0.169853            | 0.000875            | 0.024220            | 0.002359            | 0.132343            | 0.013252            | 0.101697            |
| 0.016422            | 0.013905            | 0.187083            | 0.001155            | 0.037467            | 0.003624            | 0.137905            | 0.015429            | 0.139830            |
| 0.014204            | 0.007301            | 0.261050            | 0.000692            | 0.038537            | 0.003049            | 0.086713            | 0.005849            | 0.159585            |
| 0.013862            | 0.009939            | 0.263764            | 0.000634            | 0.037612            | 0.003017            | 0.078418            | 0.004935            | 0.178912            |
| 0.017526            | 0.013561            | 0.313308            | 0.000848            | 0.039163            | 0.003120            | 0.091230            | 0.004232            | 0.169065            |
| 0.015095            | 0.013510            | 0.309967            | 0.001178            | 0.042107            | 0.003308            | 0.085121            | 0.008610            | 0.196172            |
| 0.013051            | 0.007869            | 0.236567            | 0.000827            | 0.039290            | 0.002356            | 0.085983            | 0.005374            | 0.185606            |
| 0.011347            | 0.006608            | 0.221978            | 0.000729            | 0.029946            | 0.002721            | 0.074248            | 0.008249            | 0.137594            |
| 0.008101            | 0.005419            | 0.054496            | 0.000531            | 0.010469            | 0.001255            | 0.048104            | 0.005610            | 0.079236            |
| 0.010158            | 0.006210            | 0.239616            | 0.000867            | 0.027561            | 0.002211            | 0.072735            | 0.006890            | 0.135729            |
| 0.026623            | 0.016275            | 0.048659            | 0.001531            | 0.057069            | 0.008844            | 0.048323            | 0.005916            | 0.072737            |
| 0.025934            | 0.027604            | 0.053698            | 0.001774            | 0.092848            | 0.009106            | 0.052959            | 0.019519            | 0.087233            |
| 0.021401            | 0.007208            | 0.041344            | 0.001164            | 0.039936            | 0.003505            | 0.025627            | 0.002173            | 0.056871            |
| 0.038782            | 0.028987            | 0.048079            | 0.002984            | 0.085469            | 0.009301            | 0.041855            | 0.009109            | 0.127763            |
| 0.026760            | 0.009527            | 0.045633            | 0.000638            | 0.056965            | 0.004698            | 0.052418            | 0.008067            | 0.055407            |
| 0.047930            | 0.016143            | 0.066388            | 0.007479            | 0.056998            | 0.004701            | 0.063244            | 0.008651            | 0.101325            |
| 0.038051            | 0.007110            | 0.073002            | 0.001434            | 0.051620            | 0.002428            | 0.028244            | 0.005241            | 0.077701            |
| 0.036125            | 0.007387            | 0.058685            | 0.001553            | 0.050037            | 0.004610            | 0.059504            | 0.004453            | 0.103603            |
| 0.020028            | 0.006887            | 0.047635            | 0.001332            | 0.061990            | 0.006516            | 0.047635            | 0.007749            | 0.069260            |
| 0.017972            | 0.037731            | 0.039882            | 0.001345            | 0.105983            | 0.011453            | 0.062582            | 0.017725            | 0.069922            |
| 0.013250            | 0.037736            | 0.049108            | 0.001452            | 0.094215            | 0.012024            | 0.052269            | 0.009903            | 0.096864            |
| 0.009906            | 0.021233            | 0.042173            | 0.000615            | 0.065720            | 0.008446            | 0.052646            | 0.008102            | 0.040737            |
| 0.011822            | 0.016952            | 0.070688            | 0.000867            | 0.063267            | 0.003715            | 0.030983            | 0.007029            | 0.059854            |
| 0.017908            | 0.038922            | 0.045334            | 0.001200            | 0.099908            | 0.016139            | 0.081150            | 0.012751            | 0.085185            |
| 0.013954            | 0.008530            | 0.045023            | 0.000529            | 0.042890            | 0.004295            | 0.029704            | 0.007582            | 0.041429            |
| 0.023331            | 0.007750            | 0.054726            | 0.000205            | 0.052862            | 0.005556            | 0.050358            | 0.008964            | 0.057050            |



| 2 <sup>^-</sup> ΔCT |
|---------------------|---------------------|---------------------|---------------------|---------------------|---------------------|---------------------|---------------------|---------------------|
| Rel                 | Rela                | Relb                | Ripk1               | Ripk2               | Slc20a1             | Smad3               | Stat1               | Tbk1                |
| 0.019684            | 0.016211            | 0.001839            | 0.003528            | 0.024402            | 0.163022            | 0.082078            | 0.042193            | 0.082078            |
| 0.018838            | 0.018969            | 0.001772            | 0.005013            | 0.021047            | 0.223719            | 0.061629            | 0.046706            | 0.108049            |
| 0.019310            | 0.018017            | 0.002206            | 0.004473            | 0.020270            | 0.132632            | 0.094437            | 0.042556            | 0.103342            |
| 0.015120            | 0.014206            | 0.001957            | 0.002767            | 0.024563            | 0.200632            | 0.126976            | 0.042178            | 0.102424            |
| 0.019243            | 0.011682            | 0.001565            | 0.003196            | 0.024357            | 0.133088            | 0.067942            | 0.044516            | 0.085998            |
| 0.016209            | 0.008105            | 0.006142            | 0.005237            | 0.018879            | 0.104600            | 0.036726            | 0.023732            | 0.099646            |
| 0.015205            | 0.007926            | 0.004879            | 0.004160            | 0.020628            | 0.115882            | 0.026844            | 0.033510            | 0.103001            |
| 0.013585            | 0.008538            | 0.005594            | 0.003874            | 0.029526            | 0.093957            | 0.034630            | 0.030568            | 0.118105            |
| 0.015979            | 0.007559            | 0.005849            | 0.004341            | 0.025074            | 0.080345            | 0.040452            | 0.019402            | 0.096212            |
| 0.017358            | 0.008619            | 0.006310            | 0.005343            | 0.021370            | 0.154080            | 0.010465            | 0.034476            | 0.121729            |
| 0.014402            | 0.014807            | 0.001800            | 0.003502            | 0.020940            | 0.162939            | 0.067564            | 0.048442            | 0.086713            |
| 0.023153            | 0.016949            | 0.001628            | 0.003588            | 0.019335            | 0.185221            | 0.072159            | 0.041733            | 0.092611            |
| 0.021133            | 0.014434            | 0.002499            | 0.005068            | 0.025483            | 0.221542            | 0.078327            | 0.044987            | 0.084533            |
| 0.017827            | 0.020056            | 0.002050            | 0.005602            | 0.020336            | 0.163821            | 0.084799            | 0.049728            | 0.088400            |
| 0.014481            | 0.013605            | 0.002153            | 0.002706            | 0.018715            | 0.157161            | 0.064718            | 0.046402            | 0.082487            |
| 0.015501            | 0.010810            | 0.004153            | 0.003468            | 0.020739            | 0.125738            | 0.045076            | 0.036867            | 0.082956            |
| 0.004987            | 0.009501            | 0.002097            | 0.003502            | 0.016890            | 0.136059            | 0.031958            | 0.025248            | 0.052640            |
| 0.013128            | 0.009949            | 0.004422            | 0.003744            | 0.016275            | 0.133860            | 0.066930            | 0.036621            | 0.082401            |
| 0.055508            | 0.010812            | 0.001479            | 0.008662            | 0.010159            | 0.029134            | 0.009219            | 0.088317            | 0.023177            |
| 0.072344            | 0.014092            | 0.002474            | 0.016076            | 0.011526            | 0.035674            | 0.018594            | 0.098824            | 0.023373            |
| 0.022465            | 0.003731            | 0.001375            | 0.005734            | 0.004256            | 0.034766            | 0.008454            | 0.059286            | 0.014719            |
| 0.052978            | 0.019257            | 0.001679            | 0.005454            | 0.003938            | 0.034953            | 0.019124            | 0.105224            | 0.027234            |
| 0.029692            | 0.006329            | 0.000988            | 0.006329            | 0.004897            | 0.022659            | 0.007579            | 0.055024            | 0.013852            |
| 0.039749            | 0.014250            | 0.000481            | 0.009081            | 0.002626            | 0.022672            | 0.013669            | 0.073153            | 0.018933            |
| 0.019696            | 0.008339            | 0.000454            | 0.009062            | 0.003249            | 0.013176            | 0.010628            | 0.041351            | 0.013453            |
| 0.036629            | 0.007594            | 0.002035            | 0.005223            | 0.002760            | 0.027378            | 0.005598            | 0.063775            | 0.024504            |
| 0.037896            | 0.007803            | 0.000897            | 0.005594            | 0.004011            | 0.023653            | 0.011503            | 0.044445            | 0.018176            |
| 0.091626            | 0.014598            | 0.005306            | 0.013156            | 0.010911            | 0.024551            | 0.009303            | 0.184526            | 0.028006            |
| 0.084911            | 0.010041            | 0.003550            | 0.007878            | 0.008621            | 0.030021            | 0.012710            | 0.111267            | 0.024725            |
| 0.077079            | 0.009179            | 0.002082            | 0.005092            | 0.006014            | 0.022135            | 0.006766            | 0.088540            | 0.036209            |
| 0.055846            | 0.008654            | 0.000396            | 0.004065            | 0.006077            | 0.024648            | 0.011987            | 0.139429            | 0.018940            |
| 0.102007            | 0.017298            | 0.002913            | 0.010429            | 0.013385            | 0.023630            | 0.012663            | 0.128224            | 0.027332            |
| 0.038655            | 0.006074            | 0.001605            | 0.005179            | 0.002433            | 0.022826            | 0.007582            | 0.086378            | 0.022668            |
| 0.033922            | 0.006562            | 0.001053            | 0.005713            | 0.010587            | 0.014972            | 0.004211            | 0.077933            | 0.021618            |



| 2 <sup>Δ</sup> -ΔCT |
|---------------------|---------------------|---------------------|---------------------|---------------------|---------------------|---------------------|---------------------|---------------------|
| Tlr1                | Tlr2                | Tlr3                | Tlr4                | Tlr6                | Tlr9                | Tnf                 | Tnfaip3             | Tnfrsf10b           |
| 0.000985            | 0.002443            | 0.031102            | 0.004623            | 0.004196            | 0.002807            | 0.000027            | 0.006630            | 0.004374            |
| 0.001343            | 0.002724            | 0.028355            | 0.004842            | 0.004455            | 0.003879            | 0.000030            | 0.005838            | 0.004875            |
| 0.001804            | 0.003098            | 0.023284            | 0.004929            | 0.004116            | 0.002516            | 0.000278            | 0.005431            | 0.004473            |
| 0.001600            | 0.003268            | 0.030032            | 0.004654            | 0.001657            | 0.003527            | 0.000336            | 0.004686            | 0.005769            |
| 0.001325            | 0.001995            | 0.025391            | 0.005228            | 0.003962            | 0.002841            | 0.000281            | 0.007445            | 0.003697            |
| 0.001788            | 0.002172            | 0.030883            | 0.004404            | 0.006228            | 0.003914            | 0.000188            | 0.004687            | 0.002806            |
| 0.002109            | 0.002168            | 0.048052            | 0.003547            | 0.004160            | 0.002783            | 0.000204            | 0.004584            | 0.003854            |
| 0.001370            | 0.001408            | 0.039231            | 0.004420            | 0.005913            | 0.003742            | 0.000355            | 0.004904            | 0.002401            |
| 0.002156            | 0.001680            | 0.028406            | 0.003779            | 0.008045            | 0.004685            | 0.000231            | 0.003832            | 0.003336            |
| 0.003266            | 0.003335            | 0.031072            | 0.003155            | 0.003649            | 0.004749            | 0.000358            | 0.004340            | 0.003938            |
| 0.001452            | 0.002864            | 0.030871            | 0.003290            | 0.001825            | 0.002986            | 0.000119            | 0.006055            | 0.003600            |
| 0.000955            | 0.001757            | 0.033431            | 0.003766            | 0.001286            | 0.003348            | 0.000108            | 0.008017            | 0.004150            |
| 0.000960            | 0.001855            | 0.041397            | 0.002364            | 0.001804            | 0.002332            | 0.000086            | 0.010567            | 0.006111            |
| 0.001325            | 0.001981            | 0.039015            | 0.002821            | 0.000681            | 0.002920            | 0.000102            | 0.010898            | 0.004777            |
| 0.001178            | 0.002094            | 0.025743            | 0.003880            | 0.001631            | 0.002687            | 0.000031            | 0.006709            | 0.003240            |
| 0.001938            | 0.001305            | 0.032318            | 0.002369            | 0.002817            | 0.002817            | 0.000124            | 0.007034            | 0.001872            |
| 0.001327            | 0.001970            | 0.019002            | 0.002654            | 0.001813            | 0.002672            | 0.000189            | 0.008989            | 0.003885            |
| 0.002077            | 0.001521            | 0.024668            | 0.002684            | 0.001652            | 0.002958            | 0.000211            | 0.009283            | 0.002741            |
| 0.016733            | 0.022233            | 0.002666            | 0.050027            | 0.039523            | 0.003930            | 0.001664            | 0.006656            | 0.001083            |
| 0.016758            | 0.024535            | 0.000557            | 0.040978            | 0.036423            | 0.008980            | 0.000799            | 0.010245            | 0.001502            |
| 0.027658            | 0.008752            | 0.000678            | 0.036749            | 0.024078            | 0.003094            | 0.004227            | 0.003433            | #NULL!              |
| 0.020497            | 0.026124            | 0.000000            | 0.030218            | 0.019799            | 0.006094            | 0.001335            | 0.003500            | 0.002475            |
| 0.016936            | 0.006114            | 0.000321            | 0.026209            | 0.033405            | 0.008409            | #NULL!              | 0.001593            | 0.000396            |
| 0.015811            | 0.035576            | 0.000000            | 0.078949            | 0.060248            | 0.007076            | 0.002163            | 0.006246            | 0.001277            |
| 0.009062            | 0.040221            | 0.000283            | 0.052705            | 0.029648            | 0.001959            | 0.001636            | 0.005578            | 0.002014            |
| 0.023669            | 0.045096            | 0.000000            | 0.069789            | 0.052890            | 0.000898            | 0.003238            | 0.003375            | 0.000930            |
| 0.009025            | 0.013775            | 0.000739            | 0.035604            | 0.020591            | 0.007537            | 0.003928            | 0.003874            | 0.000699            |
| 0.042745            | 0.019531            | 0.001915            | 0.024213            | 0.012190            | 0.015646            | 0.000423            | 0.010612            | 0.001472            |
| 0.024216            | 0.019132            | 0.000000            | 0.014701            | 0.006311            | 0.006625            | 0.000550            | 0.009566            | #NULL!              |
| 0.025603            | 0.005199            | 0.000032            | 0.015544            | 0.004751            | 0.006535            | 0.000999            | 0.005890            | 0.001013            |
| 0.020726            | 0.011419            | 0.000000            | 0.012154            | 0.004670            | 0.009602            | 0.003539            | 0.003539            | #NULL!              |
| 0.041142            | 0.014851            | 0.001216            | 0.029703            | 0.008589            | 0.015375            | 0.003791            | 0.009935            | 0.003210            |
| 0.017419            | 0.010074            | 0.000430            | 0.016594            | 0.006786            | 0.006376            | 0.001650            | 0.009270            | 0.000643            |
| 0.023331            | 0.007131            | 0.000142            | 0.019893            | 0.010015            | 0.006654            | 0.004124            | 0.004482            | 0.000013            |



| 2 <sup>Δ</sup> -ΔCT |
|---------------------|---------------------|---------------------|---------------------|---------------------|---------------------|---------------------|---------------------|---------------------|
| Tnfrsf1a            | Tnfrsf1b            | Tnfsf10             | Tnfsf14             | Tollip              | Tradd               | Traf2               | Traf3               | Traf5               |
| 0.018239            | 0.006863            | 0.004404            | 0.000238            | 0.167606            | 0.019684            | 0.015878            | 0.047469            | 0.004254            |
| 0.023032            | 0.006433            | 0.005920            | 0.000459            | 0.167213            | 0.029765            | 0.016744            | 0.047031            | 0.003496            |
| 0.023123            | 0.010065            | 0.002348            | 0.000240            | 0.170223            | 0.030938            | 0.013654            | 0.053124            | 0.004631            |
| 0.018232            | 0.006183            | 0.003996            | 0.000403            | 0.188498            | 0.022760            | 0.014010            | 0.047452            | 0.004818            |
| 0.015098            | 0.005681            | 0.005488            | 0.000850            | 0.161595            | 0.024357            | 0.011363            | 0.050083            | 0.002340            |
| 0.012630            | 0.004373            | 0.007506            | 0.007774            | 0.109042            | 0.027450            | 0.006629            | 0.017493            | 0.002264            |
| 0.013609            | 0.004131            | 0.005924            | 0.006305            | 0.109631            | 0.027598            | 0.005565            | 0.022417            | 0.002109            |
| 0.012414            | 0.004607            | 0.006840            | 0.006653            | 0.103532            | 0.025704            | 0.006935            | 0.020307            | 0.002977            |
| 0.014302            | 0.004136            | 0.005611            | 0.006580            | 0.116820            | 0.020367            | 0.006400            | 0.021828            | 0.002425            |
| 0.016651            | 0.004400            | 0.008923            | 0.010109            | 0.120889            | 0.039329            | 0.008500            | 0.024043            | 0.002325            |
| 0.016203            | 0.006140            | 0.003626            | 0.000606            | 0.148898            | 0.024730            | 0.013070            | 0.058008            | 0.002111            |
| 0.011182            | 0.004417            | 0.003714            | 0.000060            | 0.193087            | 0.018676            | 0.011985            | 0.038137            | 0.002815            |
| 0.020413            | 0.004321            | 0.003710            | 0.000043            | 0.187590            | 0.019046            | 0.014137            | 0.046897            | 0.003684            |
| 0.021347            | 0.005922            | 0.003961            | 0.000057            | 0.174366            | 0.024521            | 0.012261            | 0.051126            | 0.002961            |
| 0.016520            | 0.005337            | 0.002961            | 0.000373            | 0.159355            | 0.023688            | 0.013325            | 0.056341            | 0.003023            |
| 0.010514            | 0.003929            | 0.005043            | 0.004577            | 0.124869            | 0.018054            | 0.008659            | 0.033925            | 0.001938            |
| 0.012450            | 0.003027            | 0.003267            | 0.001124            | 0.145824            | 0.019267            | 0.009973            | 0.043655            | 0.002310            |
| 0.011039            | 0.004242            | 0.004126            | 0.002353            | 0.134791            | 0.016388            | 0.008661            | 0.032776            | 0.002419            |
| 0.105758            | 0.060322            | 0.002629            | 0.069774            | 0.079046            | 0.022543            | 0.011750            | 0.002353            | 0.019221            |
| 0.106654            | 0.065200            | 0.003647            | 0.088450            | 0.085437            | 0.024706            | 0.009827            | 0.006712            | 0.056760            |
| 0.065327            | 0.024078            | 0.002158            | 0.066239            | 0.059698            | 0.016791            | 0.010627            | 0.006363            | 0.011389            |
| 0.143741            | 0.108183            | 0.004715            | 0.049430            | 0.116754            | 0.022901            | 0.011293            | 0.007554            | 0.027423            |
| 0.068689            | 0.073619            | 0.001015            | 0.088770            | 0.088157            | 0.013948            | 0.012484            | 0.008951            | 0.016022            |
| 0.190395            | 0.113997            | 0.004799            | 0.140347            | 0.075733            | 0.028897            | 0.011817            | 0.007689            | 0.016255            |
| 0.117773            | 0.000000            | 0.003226            | 0.101116            | 0.095001            | 0.013928            | 0.008111            | 0.003890            | 0.012639            |
| 0.158125            | 0.100770            | 0.005521            | 0.130230            | 0.087725            | 0.022548            | 0.009285            | 0.002092            | 0.008907            |
| 0.080113            | 0.062855            | 0.002521            | 0.086460            | 0.068307            | 0.016381            | 0.011745            | 0.004770            | 0.011745            |
| 0.065694            | 0.087893            | 0.005380            | 0.032395            | 0.053731            | 0.025066            | 0.013156            | 0.007609            | 0.040721            |
| 0.045503            | 0.071402            | 0.001383            | 0.039339            | 0.127813            | 0.017727            | 0.022751            | 0.007199            | 0.031953            |
| 0.030448            | 0.054127            | 0.004372            | 0.043661            | 0.064815            | 0.012802            | 0.009975            | 0.006445            | 0.026141            |
| 0.044121            | 0.070688            | 0.003793            | 0.047948            | 0.120541            | 0.024648            | 0.007639            | 0.004180            | 0.008075            |
| 0.042006            | 0.054287            | 0.005667            | 0.032503            | 0.053539            | 0.024463            | 0.023630            | 0.013019            | 0.055044            |
| 0.025503            | 0.051718            | 0.004933            | 0.034838            | 0.053172            | 0.018930            | 0.004540            | 0.004063            | 0.010575            |
| 0.036610            | 0.087073            | 0.003590            | 0.037379            | 0.059473            | 0.019349            | 0.010513            | 0.006383            | 0.012765            |



| 2 <sup>Δ</sup> -ΔCT |
|---------------------|---------------------|---------------------|---------------------|---------------------|---------------------|---------------------|---------------------|---------------------|
| Traf6               | Zap70               | Alb                 | Als2                | Aox1                | Apc                 | Apoe                | Atr                 | Cat                 |
| 0.033104            | 0.006863            | 0.001014            | 0.106061            | 0.009052            | 0.302754            | 3.417521            | 0.049555            | 0.127813            |
| 0.037675            | 0.005298            | 0.000903            | 0.079717            | 0.005705            | 0.332079            | 3.150710            | 0.046244            | 0.123180            |
| 0.039706            | 0.007788            | 0.000795            | 0.074413            | 0.005949            | 0.284211            | 2.676149            | 0.042898            | 0.116653            |
| 0.038013            | 0.008331            | 0.001312            | 0.108437            | 0.006911            | 0.240360            | 3.047744            | 0.049596            | 0.134815            |
| 0.035169            | 0.005412            | 0.000765            | 0.089238            | 0.004930            | 0.244211            | 2.199354            | 0.035482            | 0.115642            |
| 0.036221            | 0.004753            | 0.005098            | 0.078490            | 0.007181            | 0.432827            | 3.736869            | 0.078355            | 0.162679            |
| 0.035176            | 0.003672            | 0.004512            | 0.081274            | 0.007736            | 0.395830            | 3.259427            | 0.069161            | 0.173368            |
| 0.034870            | 0.004359            | 0.005525            | 0.109625            | 0.008695            | 0.540762            | 4.698896            | 0.096435            | 0.229140            |
| 0.043961            | 0.004341            | 0.000392            | 0.070140            | 0.009036            | 0.392823            | 2.666166            | 0.067129            | 0.135266            |
| 0.028394            | 0.004950            | 0.005353            | 0.097114            | 0.009371            | 0.449209            | 3.715495            | 0.088251            | 0.206377            |
| 0.038537            | 0.010398            | 0.000670            | 0.063927            | 0.005891            | 0.215226            | 2.564419            | 0.031845            | 0.095463            |
| 0.034133            | 0.006467            | 0.000207            | 0.082217            | 0.007551            | 0.274554            | 2.977613            | 0.034683            | 0.119064            |
| 0.030941            | 0.008233            | 0.000238            | 0.111531            | 0.007602            | 0.337657            | 3.216231            | 0.023855            | 0.125887            |
| 0.042694            | 0.012781            | 0.000177            | 0.096481            | 0.008080            | 0.290549            | 3.324336            | 0.038134            | 0.124573            |
| 0.039290            | 0.010099            | 0.001058            | 0.080571            | 0.005543            | 0.276076            | 3.056466            | 0.035464            | 0.117901            |
| 0.028527            | 0.008540            | 0.001609            | 0.092409            | 0.006899            | 0.317491            | 3.038310            | 0.046451            | 0.145706            |
| 0.053746            | 0.008214            | 0.000953            | 0.012246            | 0.001107            | 0.047671            | 0.260853            | 0.006478            | 0.011469            |
| 0.031660            | 0.006210            | 0.001477            | 0.076039            | 0.006309            | 0.300698            | 2.921429            | 0.044446            | 0.107023            |
| #NULL!              | 0.017810            | 1.512385            | 0.045960            | 0.000000            | 0.003703            | 0.117032            | 0.007965            | 0.968906            |
| 0.006901            | 0.017349            | 0.001483            | 0.026440            | 0.000000            | 0.003204            | 0.085063            | 0.008183            | 1.754050            |
| #NULL!              | 0.008454            | 0.000091            | 0.059396            | 0.000000            | 0.007002            | 0.034574            | 0.005839            | 1.012499            |
| 0.005342            | 0.024039            | 0.000272            | 0.028054            | 0.000000            | 0.003552            | 0.122866            | 0.002712            | 2.961159            |
| 0.009527            | 0.011648            | 0.000046            | 0.018579            | 0.000000            | 0.005543            | 0.074090            | 0.002590            | 1.065672            |
| 0.005950            | 0.020152            | 0.000158            | 0.019409            | 0.000000            | 0.003378            | 0.103887            | 0.005038            | 1.111356            |
| 0.002602            | 0.009848            | 0.000218            | 0.017837            | 0.000267            | 0.002707            | 0.079855            | 0.003770            | 1.424482            |
| #NULL!              | 0.010592            | 0.000517            | 0.043269            | 0.000000            | 0.006841            | 0.076572            | 0.002107            | 1.544708            |
| 0.003901            | 0.007642            | 0.000146            | 0.031818            | 0.000000            | 0.003096            | 0.086863            | 0.003376            | 1.107864            |
| 0.006223            | 0.008099            | 0.000020            | 0.016258            | 0.000000            | 0.004590            | 0.160756            | 0.003453            | 3.229288            |
| 0.007824            | 0.011777            | 0.000345            | 0.015947            | 0.000000            | 0.006322            | 0.088871            | 0.001825            | 7.076050            |
| #NULL!              | 0.005972            | 0.000520            | 0.034655            | 0.000000            | 0.003656            | 0.061925            | 0.007428            | 4.367108            |
| 0.002485            | 0.009022            | 0.000689            | 0.019491            | 0.000000            | 0.004736            | 0.060864            | 0.003866            | 5.902578            |
| 0.010285            | 0.008014            | 0.000172            | 0.020784            | 0.000000            | 0.001489            | 0.114114            | 0.010976            | 4.101874            |
| 0.000764            | 0.015164            | 0.002627            | 0.030314            | 0.000000            | 0.004724            | 0.120720            | 0.002828            | 2.963001            |
| 0.005184            | 0.007332            | 0.000445            | 0.026281            | 0.000000            | 0.003857            | 0.117062            | 0.002360            | 1.988118            |



| 2 <sup>Δ</sup> -ΔCT |
|---------------------|---------------------|---------------------|---------------------|---------------------|---------------------|---------------------|---------------------|---------------------|
| Ccs                 | Ctsb                | Cyba                | Cygb                | Dnm2                | Duox1               | Ehd2                | Epx                 | Ercc2               |
| 0.040397            | 0.602074            | 0.028457            | 0.082625            | 0.042009            | 0.004118            | 0.014634            | 0.002579            | 0.073861            |
| 0.043890            | 0.573880            | 0.023076            | 0.122057            | 0.034113            | 0.003133            | 0.009761            | 0.002043            | 0.057090            |
| 0.042545            | 0.503732            | 0.022009            | 0.099391            | 0.031350            | 0.002076            | 0.007490            | 0.000925            | 0.046023            |
| 0.034498            | 0.583694            | 0.028133            | 0.082309            | 0.043725            | 0.003369            | 0.008871            | 0.001528            | 0.076529            |
| 0.026468            | 0.508199            | 0.022063            | 0.098877            | 0.031704            | 0.002856            | 0.007124            | 0.001085            | 0.049669            |
| 0.033546            | 0.505302            | 0.076586            | 0.075290            | 0.055903            | 0.002601            | 0.012952            | 0.002076            | 0.049524            |
| 0.022313            | 0.414715            | 0.084225            | 0.089790            | 0.047624            | 0.002839            | 0.011042            | 0.003156            | 0.051120            |
| 0.036219            | 0.563885            | 0.083899            | 0.086895            | 0.067223            | 0.002840            | 0.015811            | 0.002850            | 0.072522            |
| 0.030182            | 0.340890            | 0.098063            | 0.051498            | 0.055745            | 0.003105            | 0.011453            | 0.002574            | 0.042355            |
| 0.022871            | 0.477833            | 0.095930            | 0.115290            | 0.068247            | 0.004633            | 0.016667            | 0.004648            | 0.072629            |
| 0.025762            | 0.340438            | 0.017309            | 0.069885            | 0.024993            | 0.001862            | 0.004827            | 0.002045            | 0.035252            |
| 0.026991            | 0.559356            | 0.018393            | 0.060028            | 0.039238            | 0.002432            | 0.008453            | 0.000517            | 0.044338            |
| 0.036793            | 0.667321            | 0.021009            | 0.097243            | 0.049785            | 0.003306            | 0.009254            | 0.000663            | 0.041025            |
| 0.038423            | 0.546081            | 0.022239            | 0.082475            | 0.039675            | 0.002676            | 0.012845            | 0.000290            | 0.039380            |
| 0.029515            | 0.531059            | 0.021429            | 0.124999            | 0.031242            | 0.002469            | 0.008318            | 0.001473            | 0.045624            |
| 0.020313            | 0.410229            | 0.046138            | 0.058446            | 0.059334            | 0.003223            | 0.009835            | 0.001550            | 0.049398            |
| 0.001701            | 0.037814            | 0.011459            | 0.006037            | 0.014116            | 0.001292            | 0.003328            | 0.000843            | 0.032015            |
| 0.019876            | 0.405348            | 0.045275            | 0.054983            | 0.052961            | 0.002624            | 0.009520            | 0.001332            | 0.050334            |
| 0.021363            | 0.171228            | 0.298968            | 0.000515            | 0.048328            | 0.000000            | 0.000952            | 0.000000            | 0.007839            |
| 0.017974            | 0.288099            | 0.291290            | 0.000335            | 0.053125            | 0.000000            | 0.000065            | 0.000000            | 0.007839            |
| 0.028137            | 0.212096            | 0.303170            | 0.000379            | 0.038474            | 0.000000            | 0.000000            | 0.000000            | 0.010145            |
| 0.024420            | 0.631102            | 0.327108            | 0.000489            | 0.047242            | 0.000000            | 0.000000            | 0.000000            | 0.005181            |
| 0.027969            | 0.200624            | 0.271592            | 0.000226            | 0.037233            | 0.000000            | 0.000000            | 0.000000            | 0.008826            |
| 0.024349            | 0.220507            | 0.380760            | 0.000195            | 0.050420            | 0.000000            | 0.000000            | 0.000010            | 0.006113            |
| 0.021266            | 0.225307            | 0.282196            | 0.001533            | 0.039377            | 0.000000            | 0.000000            | 0.001064            | 0.007290            |
| 0.026956            | 0.218581            | 0.291074            | 0.001897            | 0.043045            | 0.000000            | 0.000000            | 0.000279            | 0.008603            |
| 0.024822            | 0.193378            | 0.302577            | 0.001176            | 0.050990            | 0.000000            | 0.000050            | 0.000858            | 0.005542            |
| 0.039463            | 0.354099            | 0.217466            | 0.000254            | 0.042884            | 0.000000            | 0.000961            | 0.000000            | 0.009662            |
| 0.035266            | 0.568855            | 0.246475            | 0.000629            | 0.037802            | 0.000000            | 0.000483            | 0.000000            | 0.006580            |
| 0.030808            | 0.334856            | 0.170472            | 0.002698            | 0.022864            | 0.000659            | 0.000650            | 0.000244            | 0.009760            |
| 0.038384            | 0.488934            | 0.182756            | 0.001938            | 0.027353            | 0.000000            | 0.000689            | 0.000992            | 0.002099            |
| 0.029276            | 0.375053            | 0.331499            | 0.001124            | 0.042151            | 0.000000            | 0.002076            | 0.000000            | 0.009100            |
| 0.030996            | 0.309804            | 0.197199            | 0.002146            | 0.033529            | 0.000000            | 0.000000            | 0.001024            | 0.005634            |
| 0.021266            | 0.221911            | 0.209011            | 0.001783            | 0.025088            | 0.000000            | 0.001091            | 0.000021            | 0.006940            |



| 2 <sup>^-</sup> ΔCT |
|---------------------|---------------------|---------------------|---------------------|---------------------|---------------------|---------------------|---------------------|---------------------|
| Ercc6               | Fancc               | Fmo2                | Fth1                | Gclc                | Gclm                | Gpx1                | Gpx2                | Gpx3                |
| 0.055991            | 0.010795            | 0.004806            | 10.941519           | 0.214460            | 0.235315            | 0.388274            | 0.001267            | 0.020078            |
| 0.039146            | 0.011436            | 0.004762            | 10.170256           | 0.200220            | 0.267346            | 0.518467            | 0.001062            | 0.036248            |
| 0.040501            | 0.009308            | 0.002830            | 9.563217            | 0.172150            | 0.226240            | 0.382339            | 0.001146            | 0.038446            |
| 0.061389            | 0.009825            | 0.003380            | 9.930669            | 0.193674            | 0.230471            | 0.338398            | 0.001794            | 0.013186            |
| 0.037562            | 0.008522            | 0.003111            | 9.148233            | 0.185347            | 0.212305            | 0.423419            | 0.001155            | 0.031660            |
| 0.067267            | 0.010400            | 0.004581            | 18.981101           | 0.233024            | 0.245531            | 0.710309            | 0.002447            | 0.031883            |
| 0.062070            | 0.009414            | 0.004479            | 16.459640           | 0.245909            | 0.262519            | 0.784869            | 0.002343            | 0.093739            |
| 0.084203            | 0.010747            | 0.004862            | 19.972587           | 0.319594            | 0.321698            | 0.994076            | 0.002560            | 0.028109            |
| 0.069220            | 0.007252            | 0.003507            | 15.415850           | 0.210674            | 0.181220            | 0.493523            | 0.002660            | 0.019343            |
| 0.059046            | 0.016341            | 0.004626            | 21.322806           | 0.332306            | 0.332421            | 1.251289            | 0.004417            | 0.075696            |
| 0.028073            | 0.007272            | 0.001671            | 8.761655            | 0.133432            | 0.168196            | 0.330275            | 0.001013            | 0.020899            |
| 0.032438            | 0.011923            | 0.002287            | 12.979557           | 0.195104            | 0.206404            | 0.307132            | 0.000310            | 0.022856            |
| 0.038970            | 0.013528            | 0.002158            | 11.783017           | 0.196849            | 0.216724            | 0.383630            | 0.000810            | 0.022854            |
| 0.034021            | 0.009137            | 0.004233            | 13.934547           | 0.188921            | 0.202926            | 0.333199            | 0.000392            | 0.017391            |
| 0.038051            | 0.009240            | 0.001294            | 9.912272            | 0.170510            | 0.227564            | 0.490869            | 0.000983            | 0.021372            |
| 0.047375            | 0.009648            | 0.002511            | 13.636568           | 0.191591            | 0.199794            | 0.405755            | 0.002069            | 0.008016            |
| 0.020977            | 0.001686            | 0.000862            | 1.462932            | 0.018925            | 0.024613            | 0.042197            | 0.001154            | 0.008050            |
| 0.050190            | 0.008719            | 0.002528            | 11.313509           | 0.188880            | 0.175457            | 0.362464            | 0.001767            | 0.010076            |
| 0.000630            | 0.001504            | 0.002872            | 23.126082           | 0.077416            | 1.601747            | 99.995009           | 0.000033            | 0.001525            |
| 0.001853            | 0.002959            | 0.000000            | 25.143057           | 0.074488            | 1.881469            | 69.431546           | 0.000000            | 0.004435            |
| 0.001809            | 0.006658            | 0.000000            | 38.459133           | 0.076534            | 2.161672            | #####               | 0.000026            | 0.003647            |
| 0.004576            | 0.002636            | 0.000856            | 23.855340           | 0.060794            | 2.699945            | 63.072400           | 0.000024            | 0.005075            |
| 0.002673            | 0.003790            | 0.000000            | 18.846174           | 0.067386            | 1.377639            | 61.347142           | 0.000033            | 0.003161            |
| 0.001069            | 0.002356            | 0.000553            | 17.673417           | 0.039949            | 1.245541            | 64.814637           | 0.000025            | 0.004821            |
| 0.002144            | 0.001491            | 0.000000            | 17.416949           | 0.043993            | 1.503444            | 63.846387           | 0.000160            | 0.005301            |
| 0.000607            | 0.001180            | 0.000000            | 23.031176           | 0.069934            | 1.806029            | #####               | 0.000304            | 0.001042            |
| 0.003011            | 0.004683            | 0.000000            | 19.972450           | 0.059514            | 1.580353            | 86.522993           | 0.000053            | 0.000818            |
| 0.003151            | 0.003439            | 0.000000            | 14.956286           | 0.046785            | 1.795154            | #####               | 0.000000            | 0.004513            |
| 0.002342            | 0.003471            | 0.000000            | 22.302849           | 0.064506            | 3.913056            | 93.271666           | 0.000039            | 0.003883            |
| 0.002059            | 0.002454            | 0.000000            | 23.274216           | 0.058920            | 2.536129            | #####               | 0.001100            | 0.001855            |
| 0.001026            | 0.002995            | 0.000000            | 20.961811           | 0.044408            | 2.989851            | #####               | 0.000148            | 0.002999            |
| 0.004774            | 0.004346            | 0.000000            | 17.212521           | 0.045513            | 2.286157            | #####               | 0.000066            | 0.002878            |
| 0.001930            | 0.001420            | 0.000000            | 19.815716           | 0.049180            | 2.307401            | #####               | 0.000182            | 0.007666            |
| 0.000121            | 0.002774            | 0.000000            | 19.813509           | 0.042579            | 1.710540            | #####               | 0.000084            | 0.002430            |



| 2 <sup>^-</sup> ΔCT |
|---------------------|---------------------|---------------------|---------------------|---------------------|---------------------|---------------------|---------------------|---------------------|
| Gpx4                | Gpx5                | Gpx6                | Gpx7                | Gsr                 | Gss                 | Gstk1               | Gstp1               | Hmox1_bi            |
| 0.872103            | 0.004907            | 0.000666            | 0.006760            | 0.079282            | 0.091660            | 0.041022            | 0.795880            | 0.013672            |
| 0.851438            | 0.004642            | 0.000275            | 0.006886            | 0.078070            | 0.087377            | 0.041515            | 0.632559            | 0.007681            |
| 0.717291            | 0.002136            | 0.000141            | 0.004920            | 0.074764            | 0.067622            | 0.041915            | 0.569925            | 0.008636            |
| 0.765474            | 0.005954            | 0.000559            | 0.006614            | 0.070722            | 0.088582            | 0.037613            | 0.702349            | 0.017461            |
| 0.758319            | 0.003813            | 0.000523            | 0.004648            | 0.063335            | 0.064762            | 0.033349            | 0.578708            | 0.006902            |
| 1.095766            | 0.008055            | 0.001577            | 0.007398            | 0.063005            | 0.096382            | 0.052283            | 0.628419            | 0.018630            |
| 1.167685            | 0.007940            | 0.001118            | 0.008906            | 0.061963            | 0.086128            | 0.063303            | 0.700737            | 0.018880            |
| 1.200433            | 0.008528            | 0.001942            | 0.009829            | 0.082745            | 0.114197            | 0.059233            | 0.764194            | 0.021801            |
| 0.990841            | 0.007864            | 0.001250            | 0.008177            | 0.057761            | 0.063823            | 0.037013            | 0.544022            | 0.020409            |
| 1.456490            | 0.010293            | 0.001835            | 0.009716            | 0.086858            | 0.149579            | 0.085194            | 0.908558            | 0.018453            |
| 0.662852            | 0.004627            | 0.000462            | 0.004798            | 0.049661            | 0.056876            | 0.036183            | 0.505294            | 0.006994            |
| 0.923607            | 0.000093            | 0.000092            | 0.004904            | 0.068853            | 0.061727            | 0.041459            | 0.745920            | 0.004404            |
| 0.950640            | 0.000105            | 0.000429            | 0.006492            | 0.085585            | 0.071785            | 0.046960            | 0.663478            | 0.003227            |
| 0.890082            | 0.000080            | 0.000062            | 0.005744            | 0.064302            | 0.065950            | 0.048739            | 0.678569            | 0.005242            |
| 0.764522            | 0.004153            | 0.000420            | 0.005222            | 0.062848            | 0.058632            | 0.037414            | 0.587245            | 0.006049            |
| 0.869017            | 0.004560            | 0.000749            | 0.008052            | 0.057838            | 0.057939            | 0.043607            | 0.698045            | 0.047642            |
| 0.484464            | 0.001408            | 0.000257            | 0.004209            | 0.034248            | 0.049473            | 0.013981            | 0.162597            | 0.034643            |
| 0.934690            | 0.003047            | 0.000778            | 0.007273            | 0.071009            | 0.061242            | 0.038003            | 0.682841            | 0.048512            |
| 2.974686            | 0.000075            | 0.000000            | 0.001052            | 0.320237            | 0.020855            | 0.014345            | 0.091295            | 0.002384            |
| 2.290462            | 0.000012            | 0.000000            | 0.000000            | 0.386120            | 0.016895            | 0.012935            | 0.092452            | 0.005544            |
| 5.124251            | 0.000069            | 0.000000            | 0.000000            | 0.348857            | 0.015998            | 0.016498            | 0.058417            | 0.002764            |
| 2.000968            | 0.000028            | 0.000000            | 0.000000            | 0.464732            | 0.014975            | 0.019002            | 0.092058            | 0.006516            |
| 2.886565            | 0.000000            | 0.000000            | 0.000210            | 0.229132            | 0.014513            | 0.013179            | 0.068709            | 0.002964            |
| 2.094587            | 0.000017            | 0.000000            | 0.000179            | 0.583096            | 0.023407            | 0.012885            | 0.074274            | 0.006411            |
| 2.226819            | 0.000151            | 0.000000            | 0.000013            | 0.386418            | 0.011388            | 0.015825            | 0.064295            | 0.005680            |
| 3.150428            | 0.000236            | 0.000000            | 0.000694            | 0.552339            | 0.018593            | 0.009225            | 0.068458            | 0.008015            |
| 2.911753            | 0.000167            | 0.000000            | 0.000631            | 0.240991            | 0.020593            | 0.012574            | 0.077087            | 0.002335            |
| 1.438380            | 0.000000            | 0.000000            | 0.000000            | 0.174870            | 0.018752            | 0.007412            | 0.092709            | 0.005001            |
| 1.684044            | 0.000075            | 0.000000            | 0.000099            | 0.213864            | 0.019885            | 0.011327            | 0.107894            | 0.003514            |
| 2.167250            | 0.000549            | 0.000128            | 0.000141            | 0.144453            | 0.013011            | 0.020580            | 0.080266            | 0.006528            |
| 1.879675            | 0.000091            | 0.000000            | 0.000025            | 0.157826            | 0.014652            | 0.007337            | 0.102888            | 0.002884            |
| 1.615982            | 0.000163            | 0.000000            | 0.000533            | 0.179878            | 0.016974            | 0.015385            | 0.107682            | 0.003465            |
| 2.494342            | 0.000185            | 0.000000            | 0.000020            | 0.186925            | 0.010193            | 0.015632            | 0.108720            | 0.006317            |
| 2.440763            | 0.000172            | 0.000000            | 0.000032            | 0.169542            | 0.016923            | 0.014437            | 0.083800            | 0.004684            |



| 2 <sup>^-ΔCT</sup> |
|--------------------|--------------------|--------------------|--------------------|--------------------|--------------------|--------------------|--------------------|--------------------|
| Hspa1a             | Idh1               | Ift172             | Ii19               | Ii22               | Krt1               | Lpo                | Mb                 | Mpo                |
| 0.028221           | 0.186031           | 0.091549           | 0.000310           | 0.000354           | 0.038510           | 0.002995           | 0.005071           | 0.000420           |
| 0.015290           | 0.132581           | 0.073747           | 0.000235           | 0.001942           | 0.035371           | 0.004777           | 0.009969           | 0.000280           |
| 0.031385           | 0.125503           | 0.074799           | 0.000065           | 0.001368           | 0.021091           | 0.002680           | 0.002944           | 0.000364           |
| 0.027172           | 0.122426           | 0.091198           | 0.000348           | 0.000214           | 0.028142           | 0.002938           | 0.002936           | 0.000865           |
| 0.027301           | 0.114373           | 0.060062           | 0.000194           | 0.000176           | 0.017046           | 0.003030           | 0.003439           | 0.000362           |
| 0.031481           | 0.190187           | 0.055446           | 0.001170           | 0.001223           | 0.024198           | 0.004212           | 0.010363           | 0.002093           |
| 0.040389           | 0.194914           | 0.057566           | 0.001449           | 0.001247           | 0.022344           | 0.006210           | 0.007405           | 0.002341           |
| 0.054587           | 0.175170           | 0.058023           | 0.001453           | 0.001619           | 0.030612           | 0.003855           | 0.011304           | 0.002272           |
| 0.039615           | 0.189049           | 0.047750           | 0.001789           | 0.001833           | 0.027272           | 0.002646           | 0.007255           | 0.001520           |
| 0.032626           | 0.200807           | 0.066846           | 0.001304           | 0.001637           | 0.023973           | 0.005896           | 0.017512           | 0.002210           |
| 0.014494           | 0.098060           | 0.055472           | 0.000193           | 0.000257           | 0.034197           | 0.003253           | 0.003814           | 0.000250           |
| 0.024750           | 0.115400           | 0.081384           | 0.000123           | 0.003531           | 0.002067           | 0.000836           | 0.002080           | 0.000210           |
| 0.028680           | 0.125120           | 0.085000           | 0.000046           | 0.000340           | 0.004475           | 0.001666           | 0.002270           | 0.000133           |
| 0.070941           | 0.122507           | 0.070800           | 0.000073           | 0.000047           | 0.001767           | 0.001130           | 0.003099           | 0.000268           |
| 0.025626           | 0.096233           | 0.062462           | 0.000150           | 0.000272           | 0.034793           | 0.004214           | 0.003004           | 0.000468           |
| 0.025438           | 0.110991           | 0.064315           | 0.000639           | 0.003502           | 0.058633           | 0.001483           | 0.003201           | 0.001177           |
| 0.003003           | 0.045070           | 0.050064           | 0.000210           | 0.000112           | 0.020125           | 0.001883           | 0.002099           | 0.000484           |
| 0.023646           | 0.119340           | 0.074205           | 0.000386           | 0.000445           | 0.051449           | 0.001269           | 0.002390           | 0.000862           |
| 0.000000           | 0.035056           | 0.001365           | 0.000000           | 0.000000           | 0.000047           | 0.000000           | 0.025238           | 0.000756           |
| 0.000832           | 0.023499           | 0.002729           | 0.000591           | 0.000000           | 0.000037           | 0.000000           | 0.000000           | 0.000175           |
| 0.000341           | 0.025893           | 0.001665           | 0.002747           | 0.000000           | 0.000119           | 0.000000           | 0.000000           | 0.003008           |
| 0.000000           | 0.023505           | 0.001990           | 0.000000           | 0.000000           | 0.000049           | 0.000000           | 0.000000           | 0.000556           |
| 0.000000           | 0.021018           | 0.002210           | 0.000955           | 0.000000           | 0.000029           | 0.000000           | 0.000000           | 0.000379           |
| 0.000870           | 0.021697           | 0.001798           | 0.001754           | 0.000000           | 0.000026           | 0.000000           | 0.112322           | 0.000000           |
| 0.000346           | 0.031925           | 0.002690           | 0.000643           | 0.000019           | 0.009141           | 0.000000           | 0.049592           | 0.000786           |
| 0.001712           | 0.010841           | 0.004933           | 0.000000           | 0.000000           | 0.012592           | 0.000000           | 0.019829           | 0.000505           |
| 0.000000           | 0.015515           | 0.002142           | 0.000614           | 0.000000           | 0.003457           | 0.000105           | 0.000000           | 0.000000           |
| 0.000000           | 0.035608           | 0.004930           | 0.000573           | 0.000000           | 0.000017           | 0.000000           | 0.000000           | 0.000879           |
| 0.001035           | 0.015664           | 0.002766           | #NULL!             | 0.000000           | 0.000123           | 0.000000           | 0.003105           | 0.000000           |
| 0.003795           | 0.024986           | 0.009447           | #NULL!             | 0.000026           | 0.019887           | 0.000021           | 0.000000           | 0.000039           |
| 0.000289           | 0.029719           | 0.004324           | 0.000000           | 0.000000           | 0.003095           | 0.000000           | 0.000000           | 0.000000           |
| 0.000000           | 0.045024           | 0.007455           | 0.000000           | 0.000000           | 0.001076           | 0.000000           | 0.000000           | 0.000878           |
| 0.000984           | 0.040971           | 0.002908           | 0.000000           | 0.000027           | 0.009170           | 0.000078           | 0.000000           | 0.002364           |
| 0.000000           | 0.045232           | 0.006834           | 0.000000           | 0.000000           | 0.013345           | 0.000000           | 0.000000           | 0.000510           |



| 2 <sup>Δ</sup> -ΔCT |
|---------------------|---------------------|---------------------|---------------------|---------------------|---------------------|---------------------|---------------------|---------------------|
| Ncf1                | Ncf2                | Ngb                 | Nos2                | Nox1                | Nox4                | Noxa1               | Noxo1               | Nqo1                |
| 0.011332            | 0.025805            | 0.006791            | 0.262872            | 0.001699            | 0.000735            | 0.014942            | 0.006362            | 0.018147            |
| 0.006519            | 0.017259            | 0.009973            | 0.187720            | 0.001829            | 0.000907            | 0.014824            | 0.005357            | 0.015626            |
| 0.008074            | 0.017993            | 0.009644            | 0.237146            | 0.000730            | 0.000951            | 0.008922            | 0.002863            | 0.015429            |
| 0.011081            | 0.021845            | 0.005433            | 0.190903            | 0.001278            | 0.000139            | 0.014286            | 0.006016            | 0.016902            |
| 0.006959            | 0.013958            | 0.011406            | 0.119357            | 0.000845            | 0.000954            | 0.011590            | 0.003884            | 0.011635            |
| 0.008770            | 0.024110            | 0.003929            | 0.165295            | 0.002071            | 0.001073            | 0.035992            | 0.012869            | 0.017477            |
| 0.011093            | 0.023410            | 0.009703            | 0.155946            | 0.001402            | 0.001520            | 0.039213            | 0.012683            | 0.018809            |
| 0.013744            | 0.022345            | 0.006130            | 0.201035            | 0.001980            | 0.000370            | 0.043484            | 0.014483            | 0.016800            |
| 0.007572            | 0.019850            | 0.002103            | 0.176541            | 0.003327            | 0.000471            | 0.037688            | 0.013087            | 0.018018            |
| 0.008942            | 0.026802            | 0.012874            | 0.180413            | 0.002154            | 0.001847            | 0.044388            | 0.013737            | 0.018705            |
| 0.006559            | 0.015005            | 0.007831            | 0.255990            | 0.000981            | 0.000332            | 0.012854            | 0.003237            | 0.014052            |
| 0.008689            | 0.013751            | 0.003586            | 0.257976            | 0.000719            | 0.000215            | 0.000281            | 0.003482            | 0.013565            |
| 0.012230            | 0.018670            | 0.007920            | 0.262019            | 0.000828            | 0.000403            | 0.000537            | 0.003953            | 0.019083            |
| 0.010528            | 0.017395            | 0.005142            | 0.298594            | 0.000335            | 0.000638            | 0.000339            | 0.003667            | 0.015918            |
| 0.006462            | 0.016841            | 0.007914            | 0.315824            | 0.000814            | 0.000578            | 0.012108            | 0.004234            | 0.011034            |
| 0.009569            | 0.019396            | 0.002277            | 0.296590            | 0.001588            | 0.000238            | 0.018636            | 0.007634            | 0.013323            |
| 0.007680            | 0.013096            | 0.004555            | 0.243955            | 0.000431            | 0.000383            | 0.004208            | 0.005042            | 0.016347            |
| 0.008389            | 0.019932            | 0.003319            | 0.418056            | 0.000789            | 0.000202            | 0.013617            | 0.006630            | 0.013190            |
| 0.069027            | 0.229394            | 0.000000            | 0.002198            | 0.000000            | 0.000000            | 0.000062            | 0.000053            | 0.026751            |
| 0.072225            | 0.226555            | 0.000000            | 0.005515            | 0.000846            | 0.000000            | 0.000017            | 0.002322            | 0.017028            |
| 0.042747            | 0.173446            | 0.000058            | 0.010437            | 0.000000            | 0.000000            | 0.000000            | 0.000419            | 0.032745            |
| 0.117415            | 0.305199            | 0.000000            | 0.006394            | 0.000000            | 0.000000            | 0.000000            | 0.001547            | 0.048882            |
| 0.066227            | 0.192834            | 0.000000            | 0.001337            | 0.000000            | 0.000000            | 0.000000            | 0.000014            | 0.017435            |
| 0.185363            | 0.426120            | 0.000000            | 0.002907            | 0.000000            | 0.000000            | 0.000037            | 0.000015            | 0.019679            |
| 0.088513            | 0.310619            | 0.000000            | 0.138482            | 0.000000            | 0.000000            | 0.000165            | 0.000578            | 0.021966            |
| 0.060055            | 0.260607            | 0.000000            | 0.146539            | 0.000000            | 0.000000            | 0.000252            | 0.000193            | 0.026230            |
| 0.065336            | 0.229528            | 0.000000            | 0.029926            | 0.000000            | 0.000000            | 0.000127            | 0.000643            | 0.016276            |
| 0.092019            | 0.142563            | 0.000000            | 0.001316            | 0.000966            | 0.000000            | #NULL!              | 0.001149            | 0.024459            |
| 0.070643            | 0.139022            | 0.000000            | 0.009570            | 0.000000            | 0.000000            | 0.000027            | 0.001605            | 0.020938            |
| 0.045039            | 0.084248            | 0.000078            | 0.155299            | 0.000000            | 0.000000            | 0.000180            | 0.001385            | 0.038384            |
| 0.047669            | 0.084729            | 0.000019            | 0.118239            | 0.000000            | 0.000000            | 0.000083            | 0.000608            | 0.037970            |
| 0.127196            | 0.143122            | 0.000000            | 0.015581            | 0.000000            | 0.000000            | 0.000056            | 0.001468            | 0.023434            |
| 0.073225            | 0.094780            | 0.000000            | 0.132787            | 0.000000            | 0.000000            | 0.000322            | 0.000631            | 0.030163            |
| 0.063437            | 0.080993            | 0.000057            | 0.136012            | 0.000000            | 0.000000            | 0.000085            | 0.000976            | 0.012671            |



| 2 <sup>Δ</sup> -ΔCT |
|---------------------|---------------------|---------------------|---------------------|---------------------|---------------------|---------------------|---------------------|---------------------|
| Park7               | Prdx1               | Prdx2               | Prdx3               | Prdx4               | Prdx5               | Prdx6               | Prnp                | Psmb5               |
| 0.351208            | 0.029182            | 0.677528            | 0.204946            | 0.063264            | 0.588533            | 0.189887            | 0.515226            | 0.768810            |
| 0.309331            | 0.036056            | 0.567508            | 0.156640            | 0.083760            | 0.553969            | 0.158638            | 0.552344            | 0.656119            |
| 0.282937            | 0.031950            | 0.500099            | 0.151542            | 0.050219            | 0.412750            | 0.171241            | 0.487915            | 0.673505            |
| 0.344237            | 0.033851            | 0.623969            | 0.193739            | 0.049517            | 0.451700            | 0.164845            | 0.353824            | 0.704238            |
| 0.303061            | 0.026026            | 0.470435            | 0.133105            | 0.050538            | 0.389903            | 0.109610            | 0.258612            | 0.535619            |
| 0.518674            | 0.037456            | 0.658083            | 0.216281            | 0.079340            | 0.532360            | 0.158909            | 0.329453            | 0.846039            |
| 0.571470            | 0.041498            | 0.726640            | 0.207284            | 0.094349            | 0.566749            | 0.152427            | 0.243964            | 0.909291            |
| 0.572336            | 0.037791            | 0.895202            | 0.228022            | 0.089381            | 0.694356            | 0.173511            | 0.268930            | 0.878314            |
| 0.488748            | 0.032873            | 0.560080            | 0.152724            | 0.056635            | 0.464688            | 0.154767            | 0.293237            | 0.930370            |
| 0.668730            | 0.052320            | 1.039178            | 0.279032            | 0.156872            | 0.783723            | 0.143946            | 0.211341            | 0.873243            |
| 0.219989            | 0.029875            | 0.436845            | 0.128747            | 0.051818            | 0.359811            | 0.140674            | 0.302754            | 0.480094            |
| 0.268405            | 0.050037            | 0.539814            | 0.202774            | 0.084339            | 0.486916            | 0.226806            | 0.515442            | 0.502925            |
| 0.273552            | 0.052207            | 0.544579            | 0.212087            | 0.083896            | 0.546389            | 0.219405            | 0.563742            | 0.496136            |
| 0.268505            | 0.042178            | 0.544554            | 0.190850            | 0.116671            | 0.521408            | 0.245136            | 0.775665            | 0.535630            |
| 0.254954            | 0.026425            | 0.476876            | 0.126857            | 0.047806            | 0.381384            | 0.147060            | 0.293436            | 0.540658            |
| 0.374931            | 0.028620            | 0.585333            | 0.179873            | 0.054334            | 0.434953            | 0.191834            | 0.214415            | 0.635993            |
| 0.504856            | 0.043412            | 0.866018            | 0.249177            | 0.082272            | 0.731131            | 0.272563            | 0.222025            | 0.621511            |
| 0.399870            | 0.034533            | 0.629152            | 0.204234            | 0.057456            | 0.499685            | 0.213594            | 0.356800            | 0.721764            |
| 0.024736            | 0.006083            | 3.189881            | 0.116554            | 0.099382            | 0.268025            | 0.307629            | 0.006859            | 0.190048            |
| 0.029689            | 0.003113            | 2.785926            | 0.111790            | 0.055848            | 0.234062            | 0.355474            | 0.011136            | 0.177062            |
| 0.024085            | 0.003099            | 2.621887            | 0.150921            | 0.057723            | 0.257667            | 0.415649            | 0.006753            | 0.218939            |
| 0.023988            | 0.010628            | 3.123748            | 0.113722            | 0.031012            | 0.262469            | 0.357610            | 0.017577            | 0.156025            |
| 0.027771            | 0.003258            | 1.741898            | 0.108053            | 0.056980            | 0.202441            | 0.298355            | 0.003556            | 0.186428            |
| 0.025804            | 0.003457            | 2.370300            | 0.070027            | 0.053131            | 0.409330            | 0.205638            | 0.002400            | 0.141688            |
| 0.019022            | 0.003802            | 2.215563            | 0.081446            | 0.042985            | 0.325292            | 0.274061            | 0.007400            | 0.156710            |
| 0.019368            | 0.003770            | 4.000946            | 0.104752            | 0.063314            | 0.337146            | 0.250369            | 0.005066            | 0.155164            |
| 0.021273            | 0.003045            | 2.604615            | 0.098782            | 0.065825            | 0.230523            | 0.268143            | 0.007366            | 0.169442            |
| 0.029071            | 0.003808            | 4.109856            | 0.085294            | 0.057806            | 0.235930            | 0.234264            | 0.010627            | 0.115077            |
| 0.020098            | 0.004719            | 5.523086            | 0.098913            | 0.034576            | 0.213717            | 0.359684            | 0.016520            | 0.105540            |
| 0.020709            | 0.004410            | 5.564218            | 0.116118            | 0.055408            | 0.215360            | 0.264368            | 0.010031            | 0.108474            |
| 0.020212            | 0.003649            | 4.368463            | 0.126519            | 0.034698            | 0.161474            | 0.300909            | 0.028153            | 0.091700            |
| 0.028087            | 0.004081            | 3.715171            | 0.106048            | 0.045422            | 0.243095            | 0.251248            | 0.008118            | 0.117550            |
| 0.024241            | 0.005687            | 5.856914            | 0.095877            | 0.043385            | 0.220236            | 0.200872            | 0.009124            | 0.098028            |
| 0.029433            | 0.005107            | 4.514231            | 0.085901            | 0.040026            | 0.332452            | 0.214333            | 0.002889            | 0.122247            |



| 2 <sup>Δ</sup> -ΔCT |
|---------------------|---------------------|---------------------|---------------------|---------------------|---------------------|---------------------|---------------------|---------------------|
| Ptgs1               | Ptgs2               | Rag2                | Recql4              | Scd1                | Serp1b1b            | Slc38a1             | Sod1                | Sod2                |
| 0.030845            | 0.049755            | 0.000701            | 0.003574            | 0.313125            | 0.012711            | 0.193899            | 0.403123            | 0.649275            |
| 0.024683            | 0.015862            | 0.000518            | 0.003198            | 0.410245            | 0.022458            | 0.257705            | 0.378221            | 0.533827            |
| 0.022477            | 0.045397            | 0.000270            | 0.002964            | 0.255231            | 0.009625            | 0.158451            | 0.290087            | 0.405166            |
| 0.026472            | 0.055880            | 0.001046            | 0.004740            | 0.289147            | 0.005828            | 0.191623            | 0.354992            | 0.587167            |
| 0.017897            | 0.036357            | 0.000629            | 0.002770            | 0.235792            | 0.013773            | 0.138675            | 0.319724            | 0.403538            |
| 0.041258            | 0.043588            | 0.002619            | 0.010271            | 0.418460            | 0.023372            | 0.243155            | 0.449496            | 0.486452            |
| 0.039411            | 0.043699            | 0.003859            | 0.010459            | 0.486564            | 0.021930            | 0.268112            | 0.497922            | 0.530416            |
| 0.044070            | 0.048137            | 0.004166            | 0.009722            | 0.354267            | 0.016667            | 0.261811            | 0.559291            | 0.579265            |
| 0.039818            | 0.058304            | 0.003533            | 0.009904            | 0.298205            | 0.009195            | 0.153520            | 0.441518            | 0.418099            |
| 0.046760            | 0.019714            | 0.003441            | 0.005478            | 0.628607            | 0.049724            | 0.388266            | 0.706644            | 0.671437            |
| 0.016101            | 0.028312            | 0.000687            | 0.003064            | 0.253817            | 0.018544            | 0.139692            | 0.318935            | 0.394903            |
| 0.017375            | 0.036541            | 0.000058            | 0.002582            | 0.265130            | 0.014064            | 0.167830            | 0.387471            | 0.505433            |
| 0.021848            | 0.034314            | 0.000070            | 0.003351            | 0.269979            | 0.024297            | 0.203105            | 0.539429            | 0.580835            |
| 0.017627            | 0.050454            | 0.000110            | 0.003002            | 0.275513            | 0.017240            | 0.169304            | 0.384012            | 0.492005            |
| 0.018364            | 0.030798            | 0.000656            | 0.003254            | 0.246862            | 0.011081            | 0.142727            | 0.266620            | 0.370153            |
| 0.028076            | 0.052931            | 0.001470            | 0.005839            | 0.254625            | 0.010178            | 0.181702            | 0.411750            | 0.433782            |
| 0.020917            | 0.046433            | 0.000232            | 0.003768            | 0.395883            | 0.015249            | 0.316472            | 0.833219            | 0.818744            |
| 0.024768            | 0.046341            | 0.001093            | 0.004479            | 0.190825            | 0.005820            | 0.144450            | 0.405257            | 0.462217            |
| 0.047140            | 0.002597            | 0.000000            | 0.000222            | 0.086507            | 0.023527            | 0.023659            | 0.166871            | 0.201890            |
| 0.056109            | 0.003293            | 0.000000            | 0.000075            | 0.039842            | 0.025366            | 0.034043            | 0.197353            | 0.174118            |
| 0.045605            | 0.000000            | 0.000000            | 0.000237            | 0.029574            | 0.016527            | 0.009834            | 0.149088            | 0.125997            |
| 0.141285            | 0.000000            | 0.000000            | 0.001950            | 0.020426            | 0.009554            | 0.032476            | 0.098606            | 0.241716            |
| 0.037356            | 0.000965            | 0.000000            | 0.001429            | 0.039185            | 0.020385            | 0.012516            | 0.111496            | 0.107611            |
| 0.033015            | 0.000014            | 0.000000            | 0.000409            | 0.029435            | 0.016723            | 0.010484            | 0.124104            | 0.148585            |
| 0.084907            | 0.000049            | 0.000000            | 0.001882            | 0.011467            | 0.025153            | 0.008971            | 0.117671            | 0.128233            |
| 0.039059            | 0.000589            | 0.000000            | 0.002848            | 0.025266            | 0.020873            | 0.006508            | 0.135549            | 0.195318            |
| 0.041677            | 0.002755            | 0.000000            | 0.000996            | 0.039841            | 0.025297            | 0.010799            | 0.146307            | 0.126702            |
| 0.048544            | 0.000583            | #NULL!              | 0.000451            | 0.100558            | 0.027937            | 0.039743            | 0.148689            | 0.198583            |
| 0.117929            | 0.000410            | #NULL!              | 0.000601            | 0.068675            | 0.033033            | 0.050201            | 0.086874            | 0.226754            |
| 0.061800            | 0.000264            | 0.000088            | 0.005120            | 0.086347            | 0.044125            | 0.025581            | 0.118217            | 0.244636            |
| 0.102923            | 0.000905            | 0.000000            | 0.000809            | 0.051255            | 0.019497            | 0.018219            | 0.120782            | 0.254221            |
| 0.061586            | 0.001191            | 0.000000            | 0.000989            | 0.144585            | 0.056539            | 0.051012            | 0.131838            | 0.215401            |
| 0.040875            | 0.000055            | 0.000000            | 0.004133            | 0.076230            | 0.023066            | 0.009797            | 0.145543            | 0.202846            |
| 0.033307            | 0.000018            | 0.000000            | 0.001906            | 0.066653            | 0.026383            | 0.011302            | 0.174300            | 0.160025            |



| 2 <sup>Δ</sup> -ΔCT |
|---------------------|---------------------|---------------------|---------------------|---------------------|---------------------|---------------------|---------------------|---------------------|
| Sod3                | Sqstm1              | Srxn1               | Tpo                 | Txn1                | Txnip               | Txnrd1              | Txnrd2              | Txnrd3              |
| 0.022143            | 0.473308            | 0.119507            | 0.001421            | 0.003937            | 0.063068            | 0.102881            | 0.036759            | 0.008017            |
| 0.021609            | 0.507558            | 0.140542            | 0.002203            | 0.002820            | 0.051704            | 0.092957            | 0.031573            | 0.009274            |
| 0.011188            | 0.426754            | 0.098407            | 0.001004            | 0.001798            | 0.049158            | 0.078743            | 0.030172            | 0.004600            |
| 0.021210            | 0.445878            | 0.118875            | 0.001694            | 0.004344            | 0.030341            | 0.099785            | 0.037985            | 0.006132            |
| 0.013418            | 0.260217            | 0.073603            | 0.001438            | 0.002388            | 0.027475            | 0.061093            | 0.022341            | 0.004622            |
| 0.017452            | 0.303336            | 0.104049            | 0.003071            | 0.014661            | 0.030937            | 0.096490            | 0.033990            | 0.006372            |
| 0.017407            | 0.325687            | 0.089016            | 0.004081            | 0.013465            | 0.041009            | 0.088260            | 0.038905            | 0.006096            |
| 0.017192            | 0.331423            | 0.092123            | 0.003572            | 0.016196            | 0.038184            | 0.094077            | 0.045018            | 0.004193            |
| 0.016726            | 0.286446            | 0.072110            | 0.003438            | 0.015700            | 0.051766            | 0.073185            | 0.037214            | 0.003800            |
| 0.026824            | 0.362553            | 0.113685            | 0.003768            | 0.018999            | 0.038662            | 0.136270            | 0.046250            | 0.007137            |
| 0.009768            | 0.307961            | 0.069941            | 0.001160            | 0.002257            | 0.035558            | 0.056780            | 0.024445            | 0.004139            |
| 0.016794            | 0.469207            | 0.077153            | 0.000286            | 0.001500            | 0.054345            | 0.063544            | 0.020869            | 0.005721            |
| 0.020756            | 0.454766            | 0.083580            | 0.000909            | 0.001960            | 0.052627            | 0.085046            | 0.023928            | 0.008096            |
| 0.023537            | 0.438330            | 0.068719            | 0.000457            | 0.001683            | 0.085569            | 0.075820            | 0.023791            | 0.006528            |
| 0.014642            | 0.379849            | 0.077905            | 0.001592            | 0.002413            | 0.023272            | 0.057996            | 0.026030            | 0.004949            |
| 0.018809            | 0.417738            | 0.074703            | 0.001343            | 0.006501            | 0.043739            | 0.064123            | 0.027592            | 0.003277            |
| 0.046059            | 0.413827            | 0.087668            | 0.000932            | 0.001985            | 0.066344            | 0.121313            | 0.037481            | 0.007772            |
| 0.026338            | 0.467026            | 0.076068            | 0.001288            | 0.004841            | 0.039025            | 0.076889            | 0.026682            | 0.004370            |
| 0.001287            | 0.092676            | 0.066408            | 0.000000            | 0.000533            | 0.390768            | 0.011276            | 0.052342            | 0.001882            |
| 0.000000            | 0.133530            | 0.086014            | 0.000000            | 0.001090            | 0.485514            | 0.011721            | 0.044287            | 0.003559            |
| 0.000000            | 0.086952            | 0.116440            | 0.000000            | 0.000000            | 0.191823            | 0.007124            | 0.074748            | 0.005612            |
| 0.000000            | 0.166122            | 0.093035            | 0.000000            | 0.000861            | 0.530700            | 0.018658            | 0.037762            | 0.005528            |
| 0.000000            | 0.081517            | 0.058845            | 0.000000            | 0.000000            | 0.304758            | 0.011120            | 0.029060            | 0.003655            |
| 0.000537            | 0.097688            | 0.045396            | 0.000000            | 0.000941            | 0.591805            | 0.014687            | 0.035483            | 0.003377            |
| 0.000000            | 0.093402            | 0.077117            | 0.000024            | 0.000365            | 0.336166            | 0.018161            | 0.021602            | 0.001992            |
| 0.000000            | 0.091664            | 0.077348            | 0.000123            | 0.001626            | 0.503285            | 0.014059            | 0.043096            | 0.005347            |
| 0.000000            | 0.098807            | 0.066470            | 0.000014            | 0.000668            | 0.333558            | 0.010277            | 0.038955            | 0.003237            |
| #NULL!              | 0.132675            | 0.050646            | #NULL!              | 0.001018            | 0.328124            | 0.015960            | 0.038764            | 0.001560            |
| #NULL!              | 0.210617            | 0.081473            | #NULL!              | 0.000125            | 0.348906            | 0.010699            | 0.062807            | 0.005264            |
| #NULL!              | 0.169547            | 0.059461            | 0.000048            | 0.000222            | 0.263380            | 0.012205            | 0.058806            | 0.001870            |
| 0.000000            | 0.198448            | 0.095413            | 0.000027            | 0.000047            | 0.242729            | 0.010494            | 0.059333            | 0.002413            |
| 0.000000            | 0.114282            | 0.055418            | 0.000065            | 0.000780            | 0.405128            | 0.015584            | 0.047674            | 0.003972            |
| 0.000000            | 0.124129            | 0.052816            | 0.000023            | 0.000843            | 0.171588            | 0.010218            | 0.050848            | 0.004723            |
| 0.000000            | 0.076271            | 0.062727            | 0.000109            | 0.000672            | 0.156276            | 0.008959            | 0.053849            | 0.001744            |



2<sup>-</sup>ΔCT      2<sup>-</sup>ΔCT      2<sup>-</sup>ΔCT      2<sup>-</sup>ΔCT

| Ucp2     | Ucp3     | Vim      | Xpa      |
|----------|----------|----------|----------|
| 0.053484 | 0.014925 | 0.104602 | 0.055091 |
| 0.052492 | 0.018547 | 0.069543 | 0.054977 |
| 0.052059 | 0.010504 | 0.060722 | 0.037550 |
| 0.048218 | 0.013385 | 0.071254 | 0.053047 |
| 0.036632 | 0.011460 | 0.035899 | 0.037513 |
| 0.056705 | 0.012695 | 0.058849 | 0.051841 |
| 0.071155 | 0.014418 | 0.052521 | 0.058555 |
| 0.056717 | 0.014815 | 0.069110 | 0.061446 |
| 0.065640 | 0.008990 | 0.067473 | 0.059102 |
| 0.073986 | 0.019723 | 0.066291 | 0.050778 |
| 0.036898 | 0.012778 | 0.059893 | 0.040591 |
| 0.033921 | 0.009263 | 0.065670 | 0.047702 |
| 0.051474 | 0.010554 | 0.077169 | 0.052500 |
| 0.042502 | 0.008103 | 0.123781 | 0.044461 |
| 0.035233 | 0.012677 | 0.037254 | 0.036463 |
| 0.032239 | 0.008125 | 0.081076 | 0.050224 |
| 0.089080 | 0.015564 | 0.117183 | 0.086143 |
| 0.034963 | 0.009407 | 0.067243 | 0.051011 |
| 1.154825 | 0.001121 | 0.190153 | 0.046117 |
| 3.162372 | 0.000000 | 0.244429 | 0.049178 |
| 1.015851 | 0.001215 | 0.120267 | 0.061989 |
| 4.315630 | 0.000000 | 0.291830 | 0.037628 |
| 2.216592 | 0.000486 | 0.160095 | 0.027850 |
| 3.244629 | 0.000441 | 0.342411 | 0.030674 |
| 2.824344 | 0.000680 | 0.371442 | 0.028692 |
| 3.103724 | 0.000809 | 0.314449 | 0.046069 |
| 2.358049 | 0.000000 | 0.168806 | 0.051217 |
| 1.807126 | 0.000567 | 0.209807 | 0.052129 |
| 3.588525 | #NULL!   | 0.252254 | 0.042072 |
| 2.423211 | 0.000013 | 0.163537 | 0.067318 |
| 5.822499 | 0.000050 | 0.160817 | 0.038283 |
| 1.943864 | 0.000000 | 0.241096 | 0.047898 |
| 2.726832 | 0.000000 | 0.103009 | 0.065024 |
| 1.820607 | 0.000024 | 0.128124 | 0.050741 |
