# Supplementary material for: Altered Blood and Brain Expression of Inflammation and Redox Genes in Alzheimer’s Disease, Common to APPV717I × TAUP301L Mice and Patients
Source: MDPI journal article supplement (doi:10.3390/ijms23105799), 2022-05-21
Supplement: s1 [file s1]

**Supplementary Table 1. List of the analyzed transcripts using qPCR array.**

**A. RT<sup>2</sup> Profiler™ PCR Array Mouse NFκB Signaling Pathway, Qiagen**

**NFκB Signaling**

**NFκB Signaling Ligands & Receptors:** Card10, Ccl2 (MCP-1), Cd27, Cd40, Csf2 (GMCSF), Egfr, F2r (Par1), Fasl, Ifng, Il10, Il1a, Il1b, Il1r1, Lta (Tnfb), Ltbr, Nod1, Tlr1, Tlr2, Tlr3, Tlr4, Tlr6, Tlr9, Tnf, Tnfrsf10b (Dr5), Tnfrsf1a (Tnfr1), Tnfrsf1b, Tnfsf10 (Trail), Tnfsf14.

**Signaling Downstream of NFκB:** Fadd, Irak1, Irak2, Irf1, Map3k1 (Mekk1), Mapk3 (Erk1), Myd88, Ripk1, Ripk2, Tnfaip3, Tollip, Tradd, Traf2, Traf3, Traf5, Traf6.

**Cytoplasmic Sequestering / Releasing of NFκB:** Bcl3, Chuk (IKBKA), Ikbkb (IKKbeta), Ikbke, Ikbkg, Nfkbia (Ikba, Mad3).

**Transcription Factors:** Nfkb1, Nfkb2, Rel, Rela, Relb.

**NFκB Responsive Genes**

**Immune Response:** Ccl2 (MCP-1), Ccl5 (Rantes), Csf1 (Mcsf), Csf2 (GMCSF), Csf3 (Gcsf), Icam1, Ifng, Irf1, Lta (Tnfb), Stat1, Tnf.

**Apoptosis:** Agt, Bcl2a1a (Bfl-1, A1), Bcl2l1 (Bcl-XL), Birc3 (cIAP1, cIAP2).

**Other NFκB Signaling Genes**

**Kinases:** Akt1, Eif2ak2, Raf1, Tbk1, Zap70.

**Transcription Factors:** Atf1, Atf2 (Creb2), Crebbp (CBP), Egr1, Elk1, Fos, Jun, Smad3.

**Other NFκB Signaling Genes:** Bcl10, Card11, Casp1 (Ice), Casp8 (Flice), Cflar (Casper), Hmox1, Slc20a1.

**B. RT<sup>2</sup> Profiler™ PCR Array Mouse Oxidative Stress and Antioxidant Defense, Qiagen**

**Antioxidants**

**Glutathione Peroxidases (GPx):** Gpx1, Gpx2, Gpx3, Gpx4, Gpx5, Gpx6, Gpx7, Gstk1, Gstp1.

**Peroxiredoxins:** (TPx)Ehd2,Prdx1,Prdx2,Prdx3,Prdx4,Prdx5,Prdx6 (Aop2).

**Other Peroxidases:** Apc, Cat, Ctsb, Duox1, Epx, Lpo, Mpo, Ptgs1 (Cox1), Ptgs2 (Cox2), Rag2, Serpinb1b, Tpo.

**Other Antioxidants:** Alb, Gsr, Sod1, Sod3, Srxn1, Txnrd1, Txnrd2, Txnrd3.

**Reactive Oxygen Species (ROS) Metabolism**

**Superoxide Dismutases (SOD):** Sod1, Sod2, Sod3.

**Other Superoxide Metabolism Genes:** Ccs, Cyba, Ncf1, Ncf2, Nos2 (iNos), Nox1, Nox4, Noxa1, Noxo1, Recql4, Scd1, Ucp2.

**Other Reactive Oxygen Species (ROS) Metabolism Genes:** Aox1, Fmo2, Il19, Il22.

**Oxidative Stress Responsive Genes:** Als2, Apoe, Cat, Ccl5 (Rantes), Ctsb, Duox1, Epx, Ercc2 (Xpd), Ercc6, Fth1, Gclc, Gclm, Gpx1, Gpx2, Gpx3, Gpx4, Gpx5, Gpx6, Gpx7, Gsr, Gss, Hmox1, Hspa1a (hsp70A1), Idh1, Krt1, Mpo, Nqo1, Park7, Prdx1, Prdx2, Prdx6 (Aop2), Prnp, Psmb5, Sod1, Sqstm1, Tpo, Txn1, Txnip, Txnrd1, Txnrd2, Ucp3, Xpa.

**Oxygen Transporters**

Atr, Cygb, Dnm2, Fancc, Ift172, Mb, Ngb, Slc38a1, Vim.
