# Supplementary material for: Altered Blood and Brain Expression of Inflammation and Redox Genes in Alzheimer’s Disease, Common to APPV717I × TAUP301L Mice and Patients
Source: MDPI journal article supplement (doi:10.3390/ijms23105799), 2022-05-21
Supplement: s1 [file s1]

**Supplementary Table 3.** Primer sequences used in this study using qPCR (individual genes).

| <b>Gene</b>           | <b>Forward primer</b>            | <b>Reverse primer</b>           |
|-----------------------|----------------------------------|---------------------------------|
| <b><i>GSR</i></b>     | TGGCACTTGCGTGAATGTTG             | TG TTCAGGCGGCTCACATAG           |
| <b><i>OSGIN 1</i></b> | CGGTGACATCGCCCACTAC              | GCTCGGACTTAGCCCACTC             |
| <b><i>GAPDH</i></b>   | CGACTTCAACAGCAACTCCCACTCTTC<br>C | TGGGTGGTCCAGGGTTTCTTACTCCT<br>T |
| <b><i>TBP</i></b>     | TGCACAGGAGCCAAGAGTGAA            | CACATCACAGCTCCCCACCA            |

*GSR* - Glutathione-Disulfide Reductase;

*OSGIN1* - Oxidative Stress Induced Growth Inhibitor 1;

*GAPDH* - Glyceraldehyde 3-phosphate dehydrogenase;

*TBP* - TATA-binding protein.
